# Supplementary material
Source: publisher site journal article supplement (https://www.dovepress.com/get_supplementary_file.php?f=supplementary_file_46647_2.pdf)
Supplement: Supplementary file 1 [file get_supplementary_file.php]

## Assessment tool

| Bias domain             | Source of bias                         | Support for judgement                                                                                                                                                                                                                                                                                                                                                  | Review authors' judgement (asses as low, unclear or high risk of bias)                                             |
|-------------------------|----------------------------------------|------------------------------------------------------------------------------------------------------------------------------------------------------------------------------------------------------------------------------------------------------------------------------------------------------------------------------------------------------------------------|--------------------------------------------------------------------------------------------------------------------|
| <b>Selection bias</b>   | Random sequence generation             | Describe the method used to generate the allocation sequence in sufficient detail to allow an assessment of whether it should produce comparable groups                                                                                                                                                                                                                | Selection bias (biased allocation to interventions) due to inadequate generation of a randomised sequence          |
|                         | Allocation concealment                 | Describe the method used to conceal the allocation sequence in sufficient detail to determine whether intervention allocations could have been foreseen before or during enrolment                                                                                                                                                                                     | Selection bias (biased allocation to interventions) due to inadequate concealment of allocations before assignment |
| <b>Performance bias</b> | Blinding of participants and personnel | Describe all measures used, if any, to blind trial participants and researchers from knowledge of which intervention a participant received. Provide any information relating to whether the intended blinding was effective                                                                                                                                           | Performance bias due to knowledge of the allocated interventions by participants and personnel during the study    |
| <b>Detection bias</b>   | Blinding of outcome assessment         | Describe all measures used, if any, to blind outcome assessment from knowledge of which intervention a participant received. Provide any information relating to whether the intended blinding was effective                                                                                                                                                           | Detection bias due to knowledge of the allocated interventions by outcome assessment                               |
| <b>Attrition bias</b>   | Incomplete outcome data                | Describe the completeness of outcome data for each main outcome, including attrition and exclusions from the analysis. State whether attrition and exclusions were reported, the numbers in each intervention group (compared with total randomised participants), reasons for attrition or exclusions where reported, and any reinclusions in analyses for the review | Attrition bias due to amount, nature, or handling of incomplete outcome data                                       |
| <b>Reporting bias</b>   | Selective reporting                    | State how selective outcome reporting was examined and what was found                                                                                                                                                                                                                                                                                                  | Reporting bias due to selective outcome reporting                                                                  |
| <b>Other bias</b>       | Anything else, ideally pre-specified   | State any important concerns about bias not covered in the other Bias due to problems not covered elsewhere domains in the tool                                                                                                                                                                                                                                        |                                                                                                                    |

| Bias domain             | Source of bias                         | Support for judgement                                                                                   | Review authors' judgement (low, unclear or high risk of bias) |
|-------------------------|----------------------------------------|---------------------------------------------------------------------------------------------------------|---------------------------------------------------------------|
| <b>Selection bias</b>   | Random sequence generation             | "Simple random sampling was used for patients' allocation either in the intervention or control group." | Low                                                           |
|                         | Allocation concealment                 | Not described.                                                                                          | Unclear                                                       |
| <b>Performance bias</b> | Blinding of participants and personnel | Not possible due to the design of the intervention.                                                     | Low                                                           |
| <b>Detection bias</b>   | Blinding of outcome assessment         | Insufficient information given.                                                                         | Unclear                                                       |
| <b>Attrition bias</b>   | Incomplete outcome data                | High percentage of drop outs that were excluded.                                                        | Unclear                                                       |
| <b>Reporting bias</b>   | Selective reporting                    | None identified                                                                                         | Low                                                           |
| <b>Other bias</b>       | Anything else, ideally pre-specified   | n/a                                                                                                     |                                                               |

| Bias domain             | Source of bias                         | Support for judgement                                                            | Review authors' judgement (low, unclear or high risk of bias) |
|-------------------------|----------------------------------------|----------------------------------------------------------------------------------|---------------------------------------------------------------|
| <b>Selection bias</b>   | Random sequence generation             | Patients were randomized via a 'computerized coin-flip' built into the screener. | Low                                                           |
|                         | Allocation concealment                 | Computerized.                                                                    | Low                                                           |
| <b>Performance bias</b> | Blinding of participants and personnel | Not possible due to the design of the intervention.                              | High                                                          |
| <b>Detection bias</b>   | Blinding of outcome assessment         | Insufficient information given.                                                  | Unclear                                                       |
| <b>Attrition bias</b>   | Incomplete outcome data                | Drop-out were excluded from the results, but considered for potential bias.      | Low                                                           |
| <b>Reporting bias</b>   | Selective reporting                    | None identified                                                                  | Low                                                           |
| <b>Other bias</b>       | Anything else, ideally pre-specified   | n/a                                                                              |                                                               |

| Bias domain             | Source of bias                         | Support for judgement                                                                                          | Review authors' judgement (low, unclear or high risk of bias) |
|-------------------------|----------------------------------------|----------------------------------------------------------------------------------------------------------------|---------------------------------------------------------------|
| <b>Selection bias</b>   | Random sequence generation             | Using a sealed envelope technique the patients were randomly assigned to either intervention or control group. | Low                                                           |
|                         | Allocation concealment                 | Sealed envelopes                                                                                               | Low                                                           |
| <b>Performance bias</b> | Blinding of participants and personnel | Not possible due to the design of the intervention                                                             | High                                                          |
| <b>Detection bias</b>   | Blinding of outcome assessment         | Not blinded                                                                                                    | High                                                          |
| <b>Attrition bias</b>   | Incomplete outcome data                | Not including data from drop outs. Not considering the risk of bias.                                           | Unclear                                                       |
| <b>Reporting bias</b>   | Selective reporting                    | None identified                                                                                                | Low                                                           |
| <b>Other bias</b>       | Anything else, ideally pre-specified   | n/a                                                                                                            |                                                               |

| Bias domain             | Source of bias                         | Support for judgement                                                                                                                                                                         | Review authors' judgement (low, unclear or high risk of bias) |
|-------------------------|----------------------------------------|-----------------------------------------------------------------------------------------------------------------------------------------------------------------------------------------------|---------------------------------------------------------------|
| <b>Selection bias</b>   | Random sequence generation             | Randomising patients sequentially by day of recruitment into three groups.                                                                                                                    | High                                                          |
|                         | Allocation concealment                 | Based on day of the week                                                                                                                                                                      | High                                                          |
| <b>Performance bias</b> | Blinding of participants and personnel | The randomisation key was concealed from the interviewer, but due to the design of the intervention the patients or the pharmacist could not be blinded.                                      | High                                                          |
| <b>Detection bias</b>   | Blinding of outcome assessment         | Follow up interviewer was blinded to the randomization.                                                                                                                                       | Low                                                           |
| <b>Attrition bias</b>   | Incomplete outcome data                | Drop outs were not included in the results, but demographics compared with non-drop-outs to investigate bias.                                                                                 | Low                                                           |
| <b>Reporting bias</b>   | Selective reporting                    | None identified                                                                                                                                                                               | Low                                                           |
| <b>Other bias</b>       | Anything else, ideally pre-specified   | Significantly, 66% (P = 0.004) of the control group patients dropped out from the study after at least 6 weeks of treatment compared to 42% of the leaflets and 34% of the counselling groups |                                                               |

| Bias domain             | Source of bias                         | Support for judgement                                                                                                                                                                                                       | Review authors' judgement (low, unclear or high risk of bias) |
|-------------------------|----------------------------------------|-----------------------------------------------------------------------------------------------------------------------------------------------------------------------------------------------------------------------------|---------------------------------------------------------------|
| <b>Selection bias</b>   | Random sequence generation             | Patients were randomised sequentially by day of recruitment into a control and two treatment groups.                                                                                                                        | High                                                          |
|                         | Allocation concealment                 | By day of the week                                                                                                                                                                                                          | High                                                          |
| <b>Performance bias</b> | Blinding of participants and personnel | Not possible due to the design of the intervention                                                                                                                                                                          | High                                                          |
| <b>Detection bias</b>   | Blinding of outcome assessment         | Same person who did the recruitment that conducted the follow up interviews.                                                                                                                                                | High                                                          |
| <b>Attrition bias</b>   | Incomplete outcome data                | The effect of the educational interventions on adherence after 2 months and after 5 months has been calculated on an intention-to-treat basis using the control group as a reference. Not described for the other outcomes. | Unclear                                                       |
| <b>Reporting bias</b>   | Selective reporting                    | None identified                                                                                                                                                                                                             | Low                                                           |
| <b>Other bias</b>       | Anything else, ideally pre-specified   | n/a                                                                                                                                                                                                                         |                                                               |

| Bias domain             | Source of bias                         | Support for judgement                                                                                                   | Review authors' judgement (low, unclear or high risk of bias) |
|-------------------------|----------------------------------------|-------------------------------------------------------------------------------------------------------------------------|---------------------------------------------------------------|
| <b>Selection bias</b>   | Random sequence generation             | Restricted randomization with both groups being matched as closely as possible for gender and presence of hypertension. | Low                                                           |
|                         | Allocation concealment                 | Insufficient information given                                                                                          | Unclear                                                       |
| <b>Performance bias</b> | Blinding of participants and personnel | Not possible due to the design of the intervention                                                                      | High                                                          |
| <b>Detection bias</b>   | Blinding of outcome assessment         | No information given on blindness of pharmacy staff, but standard protocol for questionnaire administration was used.   | Unclear                                                       |
| <b>Attrition bias</b>   | Incomplete outcome data                | Drop outs were not included in the results, but demographics compared with non-drop-outs to investigate potential bias. | Low                                                           |
| <b>Reporting bias</b>   | Selective reporting                    | None identified                                                                                                         | Low                                                           |
| <b>Other bias</b>       | Anything else, ideally pre-specified   | n/a                                                                                                                     |                                                               |

| Bias domain             | Source of bias                         | Support for judgement                                                                    | Review authors' judgement (low, unclear or high risk of bias) |
|-------------------------|----------------------------------------|------------------------------------------------------------------------------------------|---------------------------------------------------------------|
| <b>Selection bias</b>   | Random sequence generation             | Group allocation codes were prepared before trial initiation using a random number table | Low                                                           |
|                         | Allocation concealment                 | The codes were kept in sealed envelopes and opened sequentially for every new subject.   | Low                                                           |
| <b>Performance bias</b> | Blinding of participants and personnel | Neither the subjects nor the researcher was blinded to the intervention.                 | High                                                          |
| <b>Detection bias</b>   | Blinding of outcome assessment         | Same pharmacist who did the first interview, conducted the follow up calls               | High                                                          |
| <b>Attrition bias</b>   | Incomplete outcome data                | One patient died, and that data was excluded.                                            | Low                                                           |
| <b>Reporting bias</b>   | Selective reporting                    | None identified                                                                          | Low                                                           |
| <b>Other bias</b>       | Anything else, ideally pre-specified   | n/a                                                                                      |                                                               |

Aragones *et al.* 2010

| Bias domain             | Source of bias                         | Support for judgement                                                                                                                                                                                    | Review authors' judgement (low, unclear or high risk of bias) |
|-------------------------|----------------------------------------|----------------------------------------------------------------------------------------------------------------------------------------------------------------------------------------------------------|---------------------------------------------------------------|
| <b>Selection bias</b>   | Random sequence generation             | Randomization of physicians was performed by computer before patient recruitment.                                                                                                                        | Low                                                           |
|                         | Allocation concealment                 | Computerized                                                                                                                                                                                             | Low                                                           |
| <b>Performance bias</b> | Blinding of participants and personnel | Patients were blind to their physician's randomization, but due to the design of the intervention the physicians were not blinded.                                                                       | Unclear                                                       |
| <b>Detection bias</b>   | Blinding of outcome assessment         | A research assistant, not involved in patient recruitment and blind to the randomization assignment, reviewed electronic medical records 3 months after the index visit to determine the primary outcome | Low                                                           |
| <b>Attrition bias</b>   | Incomplete outcome data                | Drop-out physicians were excluded, but their characteristics were compared with the study physicians and were shown to be similar. No patients were dropped after consenting to participate.             | Low                                                           |
| <b>Reporting bias</b>   | Selective reporting                    | None identified                                                                                                                                                                                          | Low                                                           |
| <b>Other bias</b>       | Anything else, ideally pre-specified   | n/a                                                                                                                                                                                                      |                                                               |

| Bias domain             | Source of bias                         | Support for judgement                                                                                                                                                                                                   | Review authors' judgement (low, unclear or high risk of bias) |
|-------------------------|----------------------------------------|-------------------------------------------------------------------------------------------------------------------------------------------------------------------------------------------------------------------------|---------------------------------------------------------------|
| <b>Selection bias</b>   | Random sequence generation             | Randomization was carried out using a pre-printed number list, conducted by two of the researchers.                                                                                                                     | Low                                                           |
|                         | Allocation concealment                 | Not concealed                                                                                                                                                                                                           | High                                                          |
| <b>Performance bias</b> | Blinding of participants and personnel | Neither pharmacists nor patients were blinded to their randomization group.                                                                                                                                             | High                                                          |
| <b>Detection bias</b>   | Blinding of outcome assessment         | Insufficient information given                                                                                                                                                                                          | Unclear                                                       |
| <b>Attrition bias</b>   | Incomplete outcome data                | A post hoc analysis was also performed for the primary outcome measure (asthma control category) on those patients who failed to complete the study. In this case, their baseline level of control was carried forward. | Low                                                           |
| <b>Reporting bias</b>   | Selective reporting                    | None identified                                                                                                                                                                                                         | Low                                                           |
| <b>Other bias</b>       | Anything else, ideally pre-specified   | n/a                                                                                                                                                                                                                     |                                                               |

| Bias domain             | Source of bias                         | Support for judgement                                                                                                                                                                                              | Review authors' judgement (low, unclear or high risk of bias) |
|-------------------------|----------------------------------------|--------------------------------------------------------------------------------------------------------------------------------------------------------------------------------------------------------------------|---------------------------------------------------------------|
| <b>Selection bias</b>   | Random sequence generation             | Randomization at pharmacist level, but no further information regarding the method used.                                                                                                                           | Unclear                                                       |
|                         | Allocation concealment                 | Insufficient information given.                                                                                                                                                                                    | Unclear                                                       |
| <b>Performance bias</b> | Blinding of participants and personnel | Pharmacists were not blinded due to the design of the intervention. No information regarding blindness of patients or doctors.                                                                                     | High                                                          |
| <b>Detection bias</b>   | Blinding of outcome assessment         | Knowledge of drug purpose was assessed by blinded pharmacists. Other knowledge parameters were assessed through the doctors passed on to the pharmacists. No information given if the doctors were blinded or not. | Low                                                           |
| <b>Attrition bias</b>   | Incomplete outcome data                | Drop outs were not included in the results, but demographics compared with non-drop-outs to investigate potential bias.                                                                                            | Low                                                           |
| <b>Reporting bias</b>   | Selective reporting                    | None identified                                                                                                                                                                                                    | Low                                                           |
| <b>Other bias</b>       | Anything else, ideally pre-specified   | n/a                                                                                                                                                                                                                |                                                               |

| Bias domain             | Source of bias                         | Support for judgement          | Review authors' judgement (low, unclear or high risk of bias) |
|-------------------------|----------------------------------------|--------------------------------|---------------------------------------------------------------|
| <b>Selection bias</b>   | Random sequence generation             | Insufficient information given | Unclear                                                       |
|                         | Allocation concealment                 | Insufficient information given | Unclear                                                       |
| <b>Performance bias</b> | Blinding of participants and personnel | Insufficient information given | Unclear                                                       |
| <b>Detection bias</b>   | Blinding of outcome assessment         | Insufficient information given | Unclear                                                       |
| <b>Attrition bias</b>   | Incomplete outcome data                | Insufficient information given | Unclear                                                       |
| <b>Reporting bias</b>   | Selective reporting                    | None identified                | Low                                                           |
| <b>Other bias</b>       | Anything else, ideally pre-specified   | n/a                            |                                                               |

| Bias domain             | Source of bias                         | Support for judgement                                                                                                         | Review authors' judgement (low, unclear or high risk of bias) |
|-------------------------|----------------------------------------|-------------------------------------------------------------------------------------------------------------------------------|---------------------------------------------------------------|
| <b>Selection bias</b>   | Random sequence generation             | Pharmacies were randomly allocated to intervention and control groups at the training workshop. No further information given. | Unclear                                                       |
|                         | Allocation concealment                 | Insufficient information given                                                                                                | Unclear                                                       |
| <b>Performance bias</b> | Blinding of participants and personnel | Nor possible due to the design of the intervention                                                                            | High                                                          |
| <b>Detection bias</b>   | Blinding of outcome assessment         | Not described                                                                                                                 | Unclear                                                       |
| <b>Attrition bias</b>   | Incomplete outcome data                | Drop outs were not included in the results, but demographics compared with non-drop-outs to investigate potential bias.       | Low                                                           |
| <b>Reporting bias</b>   | Selective reporting                    | None identified                                                                                                               | Low                                                           |
| <b>Other bias</b>       | Anything else, ideally pre-specified   | n/a                                                                                                                           |                                                               |

| Bias domain             | Source of bias                         | Support for judgement                                                                                                                                                                                                                                                                         | Review authors' judgement (low, unclear or high risk of bias) |
|-------------------------|----------------------------------------|-----------------------------------------------------------------------------------------------------------------------------------------------------------------------------------------------------------------------------------------------------------------------------------------------|---------------------------------------------------------------|
| <b>Selection bias</b>   | Random sequence generation             | Randomization was stratified by pharmacy in balanced blocks of 10 patients (1:1 ratio) using a computer-generated random-number table and provided to the pharmacist investigators in sealed envelopes identified by patient number. Patients were randomized sequentially by patient number. | Low                                                           |
|                         | Allocation concealment                 | Computerized ( sealed envelopes)                                                                                                                                                                                                                                                              | Low                                                           |
| <b>Performance bias</b> | Blinding of participants and personnel | Not possible due to the design of the intervention                                                                                                                                                                                                                                            | High                                                          |
| <b>Detection bias</b>   | Blinding of outcome assessment         | Final telephone follow up call was conducted by a pharmacist blinded to the patients' assignment group.                                                                                                                                                                                       | Low                                                           |
| <b>Attrition bias</b>   | Incomplete outcome data                | Drop outs were not included in the results, but demographics compared with non-drop-outs to investigate potential bias.                                                                                                                                                                       | Low                                                           |
| <b>Reporting bias</b>   | Selective reporting                    | None identified                                                                                                                                                                                                                                                                               | Low                                                           |
| <b>Other bias</b>       | Anything else, ideally pre-specified   | n/a                                                                                                                                                                                                                                                                                           |                                                               |

| Bias domain             | Source of bias                         | Support for judgement                                                                                                                                                                   | Review authors' judgement (low, unclear or high risk of bias) |
|-------------------------|----------------------------------------|-----------------------------------------------------------------------------------------------------------------------------------------------------------------------------------------|---------------------------------------------------------------|
| <b>Selection bias</b>   | Random sequence generation             | Randomization on physician level. "The physicians were randomly assigned within each level of experience to two intervention groups and a control group". No further information given. | Unclear                                                       |
|                         | Allocation concealment                 | Insufficient information given                                                                                                                                                          | Unclear                                                       |
| <b>Performance bias</b> | Blinding of participants and personnel | Not possible due to the design of the intervention                                                                                                                                      | High                                                          |
| <b>Detection bias</b>   | Blinding of outcome assessment         | Insufficient information given                                                                                                                                                          | Unclear                                                       |
| <b>Attrition bias</b>   | Incomplete outcome data                | Results both with and without patients who already followed the screening recommendations were presented.                                                                               | Low                                                           |
| <b>Reporting bias</b>   | Selective reporting                    | None identified                                                                                                                                                                         | Low                                                           |
| <b>Other bias</b>       | Anything else, ideally pre-specified   | n/a                                                                                                                                                                                     |                                                               |

Blenkinsopp *et al.* 2000

| Bias domain             | Source of bias                         | Support for judgement                                                                                                                                                                                                                                                                                                                         | Review authors' judgement (low, unclear or high risk of bias) |
|-------------------------|----------------------------------------|-----------------------------------------------------------------------------------------------------------------------------------------------------------------------------------------------------------------------------------------------------------------------------------------------------------------------------------------------|---------------------------------------------------------------|
| <b>Selection bias</b>   | Random sequence generation             | "At the end of the training workshop pharmacists were randomised sequentially to intervention or control sites." No further information given.                                                                                                                                                                                                | Unclear                                                       |
|                         | Allocation concealment                 | No information given                                                                                                                                                                                                                                                                                                                          | Unclear                                                       |
| <b>Performance bias</b> | Blinding of participants and personnel | Not possible for pharmacists to be blinded due to the design of the intervention. No information given on blinding patients.                                                                                                                                                                                                                  | High                                                          |
| <b>Detection bias</b>   | Blinding of outcome assessment         | For post-study BP readings: "A clinical pharmacologist and a GP advised on the allocation of patients to these categories; they were blind to the patient groups and did not know which patients was intervention or control."<br>No information regarding adherence or patient satisfaction measurements, other than made by questionnaires. | Unclear                                                       |
| <b>Attrition bias</b>   | Incomplete outcome data                | Insufficient information given                                                                                                                                                                                                                                                                                                                | Unclear                                                       |
| <b>Reporting bias</b>   | Selective reporting                    | None identified                                                                                                                                                                                                                                                                                                                               | Low                                                           |
| <b>Other bias</b>       | Anything else, ideally pre-specified   | n/a                                                                                                                                                                                                                                                                                                                                           |                                                               |

Bouvy *et al.* 2003

| Bias domain             | Source of bias                         | Support for judgement                                                                                                                                                                      | Review authors' judgement (low, unclear or high risk of bias) |
|-------------------------|----------------------------------------|--------------------------------------------------------------------------------------------------------------------------------------------------------------------------------------------|---------------------------------------------------------------|
| <b>Selection bias</b>   | Random sequence generation             | "randomly allocated patients, using a computer-generated randomization scheme"                                                                                                             | Low                                                           |
|                         | Allocation concealment                 | Computerized                                                                                                                                                                               | Low                                                           |
| <b>Performance bias</b> | Blinding of participants and personnel | "Patient's pharmacy and general practitioner (GP) were notified of their (the patients) participation in the study."                                                                       | High                                                          |
| <b>Detection bias</b>   | Blinding of outcome assessment         | "The MEMS container was filled by the patient's regular pharmacy. At the end of followup, containers were collected by pharmacists and sent in for computer-based reading and evaluation." | Low                                                           |
| <b>Attrition bias</b>   | Incomplete outcome data                | "All analyses were done on an intention-to-treat basis."                                                                                                                                   | Low                                                           |
| <b>Reporting bias</b>   | Selective reporting                    | None identified                                                                                                                                                                            | Low                                                           |
| <b>Other bias</b>       | Anything else, ideally pre-specified   | n/a                                                                                                                                                                                        |                                                               |

Braun *et al.* 2005

| Bias domain             | Source of bias                         | Support for judgement                                                                                                                                               | Review authors' judgement (low, unclear or high risk of bias) |
|-------------------------|----------------------------------------|---------------------------------------------------------------------------------------------------------------------------------------------------------------------|---------------------------------------------------------------|
| <b>Selection bias</b>   | Random sequence generation             | "Of the 16 participating clubs, eight were located in urban areas and eight were located in rural areas, and randomization was done for each stratum by coin toss." | High                                                          |
|                         | Allocation concealment                 |                                                                                                                                                                     | Unclear                                                       |
| <b>Performance bias</b> | Blinding of participants and personnel | Not possible due to the design of the intervention                                                                                                                  | High                                                          |
| <b>Detection bias</b>   | Blinding of outcome assessment         | Insufficient information given                                                                                                                                      | Unclear                                                       |
| <b>Attrition bias</b>   | Incomplete outcome data                | Do not mention anything about taking the drop outs in consideration for potential bias                                                                              | High                                                          |
| <b>Reporting bias</b>   | Selective reporting                    | None identified                                                                                                                                                     | Low                                                           |
| <b>Other bias</b>       | Anything else, ideally pre-specified   | n/a                                                                                                                                                                 |                                                               |

Calvert *et al.* 2012

| Bias domain             | Source of bias                         | Support for judgement                                                                                                                                                                  | Review authors' judgement (low, unclear or high risk of bias) |
|-------------------------|----------------------------------------|----------------------------------------------------------------------------------------------------------------------------------------------------------------------------------------|---------------------------------------------------------------|
| <b>Selection bias</b>   | Random sequence generation             | "Patients were randomized to the intervention or usual care arm in a 1:1 ratio using a computer-generated random number sequence and with treatment codes placed in sealed envelopes." | Low                                                           |
|                         | Allocation concealment                 | Computerized, sealed envelopes                                                                                                                                                         | Low                                                           |
| <b>Performance bias</b> | Blinding of participants and personnel | Not possible due to the design of the intervention.                                                                                                                                    | High                                                          |
| <b>Detection bias</b>   | Blinding of outcome assessment         | Pharmacist who carried out the follow up was blinded.                                                                                                                                  | Low                                                           |
| <b>Attrition bias</b>   | Incomplete outcome data                | Insufficient information given                                                                                                                                                         | Unclear                                                       |
| <b>Reporting bias</b>   | Selective reporting                    | None identified                                                                                                                                                                        | Low                                                           |
| <b>Other bias</b>       | Anything else, ideally pre-specified   | Those patients who declined were significantly older than participants (median age 69 vs 62 years, respectively, P = .003).                                                            |                                                               |

| Bias domain             | Source of bias                         | Support for judgement                                                                                                              | Review authors' judgement (low, unclear or high risk of bias) |
|-------------------------|----------------------------------------|------------------------------------------------------------------------------------------------------------------------------------|---------------------------------------------------------------|
| <b>Selection bias</b>   | Random sequence generation             | "41 were randomized to EC and 33 to UC." No further information given.                                                             | Unclear                                                       |
|                         | Allocation concealment                 | Insufficient information given                                                                                                     | Unclear                                                       |
| <b>Performance bias</b> | Blinding of participants and personnel | Not possible due to the design of the intervention                                                                                 | High                                                          |
| <b>Detection bias</b>   | Blinding of outcome assessment         | Insufficient information given                                                                                                     | Unclear                                                       |
| <b>Attrition bias</b>   | Incomplete outcome data                | "All EC patients were included in the analyses, regardless of whether they completed the interventions."                           | Low                                                           |
| <b>Reporting bias</b>   | Selective reporting                    | None identified                                                                                                                    | Low                                                           |
| <b>Other bias</b>       | Anything else, ideally pre-specified   | At baseline, more of the patients in the EC group had been diagnosed with major depression (DSM-IV) than in the UC group (P=0.04). |                                                               |

| Bias domain             | Source of bias                         | Support for judgement                                                                                                                                                       | Review authors' judgement (low, unclear or high risk of bias) |
|-------------------------|----------------------------------------|-----------------------------------------------------------------------------------------------------------------------------------------------------------------------------|---------------------------------------------------------------|
| <b>Selection bias</b>   | Random sequence generation             | "Randomization of clinics was performed using a table of random numbers."                                                                                                   | Low                                                           |
|                         | Allocation concealment                 |                                                                                                                                                                             | Unclear                                                       |
| <b>Performance bias</b> | Blinding of participants and personnel | Not possible due to the design of the intervention                                                                                                                          | High                                                          |
| <b>Detection bias</b>   | Blinding of outcome assessment         | "Individual data elements were double-entered into a database by a blinded data management team that included data technicians, the data manager, and the biostatistician." | Low                                                           |
| <b>Attrition bias</b>   | Incomplete outcome data                | Performing an intention-to-treat analysis                                                                                                                                   | Low                                                           |
| <b>Reporting bias</b>   | Selective reporting                    | None identified                                                                                                                                                             | Low                                                           |
| <b>Other bias</b>       | Anything else, ideally pre-specified   | Difference in baseline adherence between Intervention and control groups                                                                                                    |                                                               |

| Bias domain             | Source of bias                         | Support for judgement                                                                                                                                                                                                                                                                                                    | Review authors' judgement (low, unclear or high risk of bias) |
|-------------------------|----------------------------------------|--------------------------------------------------------------------------------------------------------------------------------------------------------------------------------------------------------------------------------------------------------------------------------------------------------------------------|---------------------------------------------------------------|
| <b>Selection bias</b>   | Random sequence generation             | The randomization codes— intervention group (1) or control group (0)— were computer generated and sealed in envelopes labelled with consecutive numbers. The envelopes were opened in the clinic in an ascending manner by the pharmacist, and patients were randomized into either intervention group or control group. | Low                                                           |
|                         | Allocation concealment                 | Computerized. Sealed envelopes. The pharmacist was blinded to the randomization codes.                                                                                                                                                                                                                                   | Low                                                           |
| <b>Performance bias</b> | Blinding of participants and personnel | Not possible due to the design of the intervention                                                                                                                                                                                                                                                                       | High                                                          |
| <b>Detection bias</b>   | Blinding of outcome assessment         | “Pharmacist used a standard questionnaire to assess the drug and disease knowledge of the patients, and questions were asked in the same manner to all patients”. But not blinded.                                                                                                                                       | High                                                          |
| <b>Attrition bias</b>   | Incomplete outcome data                | All patients completed the study                                                                                                                                                                                                                                                                                         | Low                                                           |
| <b>Reporting bias</b>   | Selective reporting                    | Changes in serum HDL-C, TG, total cholesterol, systolic blood pressure (SBP), and diastolic blood pressure (DBP) and the body mass index were not compared between the groups.                                                                                                                                           | Unclear                                                       |
| <b>Other bias</b>       | Anything else, ideally pre-specified   | n/a                                                                                                                                                                                                                                                                                                                      |                                                               |

| Bias domain             | Source of bias                         | Support for judgement                               | Review authors' judgement (low, unclear or high risk of bias) |
|-------------------------|----------------------------------------|-----------------------------------------------------|---------------------------------------------------------------|
| <b>Selection bias</b>   | Random sequence generation             | No information given                                | Unclear                                                       |
|                         | Allocation concealment                 | No information given                                | Unclear                                                       |
| <b>Performance bias</b> | Blinding of participants and personnel | Not possible due to the design of the intervention. | High                                                          |
| <b>Detection bias</b>   | Blinding of outcome assessment         | Not blinded but measured with objective methods     | Unclear                                                       |
| <b>Attrition bias</b>   | Incomplete outcome data                | All patients completed the study                    | Low                                                           |
| <b>Reporting bias</b>   | Selective reporting                    | None identified                                     | Low                                                           |
| <b>Other bias</b>       | Anything else, ideally pre-specified   | n/a                                                 |                                                               |

Choe *et al.* 2005

| Bias domain             | Source of bias                         | Support for judgement                                                                                                                                                                                                                                                  | Review authors' judgement (low, unclear or high risk of bias) |
|-------------------------|----------------------------------------|------------------------------------------------------------------------------------------------------------------------------------------------------------------------------------------------------------------------------------------------------------------------|---------------------------------------------------------------|
| <b>Selection bias</b>   | Random sequence generation             | Stratified randomization based on HbA1c levels. Randomization within each stratum was simple: because the study was small, randomization was done by hand, drawing numbers from a container that included "0" for the control group or "1" for the intervention group. | High                                                          |
|                         | Allocation concealment                 | Not concealed                                                                                                                                                                                                                                                          | High                                                          |
| <b>Performance bias</b> | Blinding of participants and personnel | Given the nature of the intervention, patients, providers, and the case manager were not blinded to the intervention.                                                                                                                                                  | High                                                          |
| <b>Detection bias</b>   | Blinding of outcome assessment         | Not described                                                                                                                                                                                                                                                          | Unclear                                                       |
| <b>Attrition bias</b>   | Incomplete outcome data                | All analyses were performed based on intention to treat                                                                                                                                                                                                                | Low                                                           |
| <b>Reporting bias</b>   | Selective reporting                    | None identified                                                                                                                                                                                                                                                        | Low                                                           |
| <b>Other bias</b>       | Anything else, ideally pre-specified   | n/a                                                                                                                                                                                                                                                                    |                                                               |

Clark *et al.* 2007

| Bias domain             | Source of bias                         | Support for judgement                                                                            | Review authors' judgement (low, unclear or high risk of bias) |
|-------------------------|----------------------------------------|--------------------------------------------------------------------------------------------------|---------------------------------------------------------------|
| <b>Selection bias</b>   | Random sequence generation             | No information given                                                                             | Unclear                                                       |
|                         | Allocation concealment                 | No information given                                                                             | Unclear                                                       |
| <b>Performance bias</b> | Blinding of participants and personnel | Not possible due to the design of the intervention.                                              | High                                                          |
| <b>Detection bias</b>   | Blinding of outcome assessment         | The same clinical pharmacist acted as investigator, observer, and educator throughout the study. | High                                                          |
| <b>Attrition bias</b>   | Incomplete outcome data                | All patients seem to have completed the study                                                    | Low                                                           |
| <b>Reporting bias</b>   | Selective reporting                    | None identified                                                                                  | Low                                                           |
| <b>Other bias</b>       | Anything else, ideally pre-specified   | n/a                                                                                              |                                                               |

Clifford *et al.* 2006

| Bias domain             | Source of bias                         | Support for judgement                                                                                                                                                                                 | Review authors' judgement (low, unclear or high risk of bias) |
|-------------------------|----------------------------------------|-------------------------------------------------------------------------------------------------------------------------------------------------------------------------------------------------------|---------------------------------------------------------------|
| <b>Selection bias</b>   | Random sequence generation             | Randomisation was by the pharmacist giving a sealed envelope to the patients, this contained their treatment group; the pharmacist was blind to the contents and took no further part in proceedings. | Low                                                           |
|                         | Allocation concealment                 | Concealed (sealed envelope)                                                                                                                                                                           | Low                                                           |
| <b>Performance bias</b> | Blinding of participants and personnel | Not possible due to the design of the intervention.                                                                                                                                                   | High                                                          |
| <b>Detection bias</b>   | Blinding of outcome assessment         | Insufficient information given                                                                                                                                                                        | Unclear                                                       |
| <b>Attrition bias</b>   | Incomplete outcome data                | Drop-outs were much more frequent than expected, leaving the study under powered.                                                                                                                     | High                                                          |
| <b>Reporting bias</b>   | Selective reporting                    | None identified                                                                                                                                                                                       | Low                                                           |
| <b>Other bias</b>       | Anything else, ideally pre-specified   | n/a                                                                                                                                                                                                   |                                                               |

Cordina *et al.* 2001

| Bias domain             | Source of bias                         | Support for judgement                                                                                                                                                                                                                                                                                                                                                                                                                | Review authors' judgement (low, unclear or high risk of bias) |
|-------------------------|----------------------------------------|--------------------------------------------------------------------------------------------------------------------------------------------------------------------------------------------------------------------------------------------------------------------------------------------------------------------------------------------------------------------------------------------------------------------------------------|---------------------------------------------------------------|
| <b>Selection bias</b>   | Random sequence generation             | Not specified                                                                                                                                                                                                                                                                                                                                                                                                                        | Unclear                                                       |
|                         | Allocation concealment                 | Not specified                                                                                                                                                                                                                                                                                                                                                                                                                        | Unclear                                                       |
| <b>Performance bias</b> | Blinding of participants and personnel | Not possible due to the design of the intervention.                                                                                                                                                                                                                                                                                                                                                                                  | High                                                          |
| <b>Detection bias</b>   | Blinding of outcome assessment         | Done by the study co-ordinator. Not described if he/she was blinded or not.                                                                                                                                                                                                                                                                                                                                                          | Unclear                                                       |
| <b>Attrition bias</b>   | Incomplete outcome data                | 20% dropouts. Analysis of baseline scores for the SF-36 dimensions showed no significant difference ( $P>0.05$ ) between the control patients who dropped out and their counterparts. In case of the intervention patients, the same pattern was observed, with the exceptions of physical functioning, vitality and bodily pain. These dimensions were significantly higher at baseline in dropouts compared to their counterparts. | Unclear                                                       |
| <b>Reporting bias</b>   | Selective reporting                    | None identified                                                                                                                                                                                                                                                                                                                                                                                                                      | Low                                                           |
| <b>Other bias</b>       | Anything else, ideally pre-specified   | The number of men was significantly lower in the intervention group ( $P=0.035$ ). The intervention group also had significantly lower mean age than the control group ( $P=0.03$ ).                                                                                                                                                                                                                                                 |                                                               |

Criswell *et al.* 2010

| Bias domain             | Source of bias                         | Support for judgement                                                                                                                                                                                                                                                        | Review authors' judgement (low, unclear or high risk of bias) |
|-------------------------|----------------------------------------|------------------------------------------------------------------------------------------------------------------------------------------------------------------------------------------------------------------------------------------------------------------------------|---------------------------------------------------------------|
| <b>Selection bias</b>   | Random sequence generation             | No information given                                                                                                                                                                                                                                                         | Unclear                                                       |
|                         | Allocation concealment                 | No information given                                                                                                                                                                                                                                                         | Unclear                                                       |
| <b>Performance bias</b> | Blinding of participants and personnel | Not possible due to the design of the intervention.                                                                                                                                                                                                                          | High                                                          |
| <b>Detection bias</b>   | Blinding of outcome assessment         | No information given                                                                                                                                                                                                                                                         | Unclear                                                       |
| <b>Attrition bias</b>   | Incomplete outcome data                | No dropouts mentioned. All patients seem to have completed the study.                                                                                                                                                                                                        | Low                                                           |
| <b>Reporting bias</b>   | Selective reporting                    | None identified.                                                                                                                                                                                                                                                             | Low                                                           |
| <b>Other bias</b>       | Anything else, ideally pre-specified   | Patients in the control group were significantly more likely to have a higher number of comorbid conditions ( $P < 0.0001$ ). The intervention group had a higher baseline blood pressure than the control group ( $P = 0.007$ for systolic and $P = 0.0149$ for diastolic). |                                                               |

De Tullio *et al.* 1987

| Bias domain             | Source of bias                         | Support for judgement                                                                                                                                                                                                                                                                                                                                                                                                                                                                               | Review authors' judgement (low, unclear or high risk of bias) |
|-------------------------|----------------------------------------|-----------------------------------------------------------------------------------------------------------------------------------------------------------------------------------------------------------------------------------------------------------------------------------------------------------------------------------------------------------------------------------------------------------------------------------------------------------------------------------------------------|---------------------------------------------------------------|
| <b>Selection bias</b>   | Random sequence generation             | "Patients who were identified over an eight-month period were randomly assigned to an experimental or control group based upon whether the last number of their Social Security number was odd or even."                                                                                                                                                                                                                                                                                            | High                                                          |
|                         | Allocation concealment                 | Not concealed                                                                                                                                                                                                                                                                                                                                                                                                                                                                                       | High                                                          |
| <b>Performance bias</b> | Blinding of participants and personnel | Not possible due to the design of the intervention.                                                                                                                                                                                                                                                                                                                                                                                                                                                 | High                                                          |
| <b>Detection bias</b>   | Blinding of outcome assessment         | Insufficient information given                                                                                                                                                                                                                                                                                                                                                                                                                                                                      | Unclear                                                       |
| <b>Attrition bias</b>   | Incomplete outcome data                | "Unfortunately, complete refill information was not available for 16 patients (9 counselled and 7 non-counselled). As a check for bias, these patients were compared with the 44 patients whose refill records were complete on the patient and medication therapy characteristics identified plus theophylline levels and alp ratio. The two groups differed only in the number of daily scheduled doses with the 16 patients taking more doses of medication per day (3.4 VS. 3.0, $P = 0.05$ )." | Low                                                           |
| <b>Reporting bias</b>   | Selective reporting                    | None identified                                                                                                                                                                                                                                                                                                                                                                                                                                                                                     | Low                                                           |
| <b>Other bias</b>       | Anything else, ideally pre-specified   | Significantly more patients in the control group taking sustained-release theophylline.                                                                                                                                                                                                                                                                                                                                                                                                             |                                                               |

| Bias domain             | Source of bias                         | Support for judgement                                                                                                                                                                                                                                                                                                                                                                                                                                                               | Review authors' judgement (low, unclear or high risk of bias) |
|-------------------------|----------------------------------------|-------------------------------------------------------------------------------------------------------------------------------------------------------------------------------------------------------------------------------------------------------------------------------------------------------------------------------------------------------------------------------------------------------------------------------------------------------------------------------------|---------------------------------------------------------------|
| <b>Selection bias</b>   | Random sequence generation             | "Randomisation was by the pharmacist giving a sealed envelope to the patients, this contained their treatment group"                                                                                                                                                                                                                                                                                                                                                                | Low                                                           |
|                         | Allocation concealment                 | The pharmacist was blind to the contents of the envelopes.                                                                                                                                                                                                                                                                                                                                                                                                                          | Low                                                           |
| <b>Performance bias</b> | Blinding of participants and personnel | Not possible due to the design of the intervention.                                                                                                                                                                                                                                                                                                                                                                                                                                 | High                                                          |
| <b>Detection bias</b>   | Blinding of outcome assessment         | Insufficient information given                                                                                                                                                                                                                                                                                                                                                                                                                                                      | Unclear                                                       |
| <b>Attrition bias</b>   | Incomplete outcome data                | "The response rates to the questionnaires were 72% (intervention) and 66% (control)."<br>"This substantial loss to follow-up could affect internal validity, and reduced power to detect statistically significant differences in cost. Those patients who were lost to follow up did not have significantly different demographics (age, sex, comorbidities, work status, prescription payment status) or 4-week adherence from those patients included in the economic analysis." | Low                                                           |
| <b>Reporting bias</b>   | Selective reporting                    | "Adherence at 4 weeks was assumed to remain unchanged at 2 months, when the cost data were collected."                                                                                                                                                                                                                                                                                                                                                                              | Unclear                                                       |
| <b>Other bias</b>       | Anything else, ideally pre-specified   | n/a                                                                                                                                                                                                                                                                                                                                                                                                                                                                                 |                                                               |

| Bias domain             | Source of bias                         | Support for judgement                                                                                                                                                   | Review authors' judgement (low, unclear or high risk of bias) |
|-------------------------|----------------------------------------|-------------------------------------------------------------------------------------------------------------------------------------------------------------------------|---------------------------------------------------------------|
| <b>Selection bias</b>   | Random sequence generation             | "Randomly assigned to either the intervention or control group by a procedure that was built into the computer system and used a set of random numbers in a 1:1 ratio." | Low                                                           |
|                         | Allocation concealment                 | Computerized                                                                                                                                                            | Low                                                           |
| <b>Performance bias</b> | Blinding of participants and personnel | Open-label. Participants and those administering the interventions were not blinded to the treatment assignment.                                                        | High                                                          |
| <b>Detection bias</b>   | Blinding of outcome assessment         | "Those assessing differences in outcomes between the pharmaceutical care and usual care groups remained blinded throughout the study."                                  | Low                                                           |
| <b>Attrition bias</b>   | Incomplete outcome data                | 14 % dropouts in the intervention group, but all patients' characteristics were compared and commented.                                                                 | Unclear                                                       |

|                       |                                      |                                                                                                                                                                                                                                                                                                                                             |     |
|-----------------------|--------------------------------------|---------------------------------------------------------------------------------------------------------------------------------------------------------------------------------------------------------------------------------------------------------------------------------------------------------------------------------------------|-----|
| <b>Reporting bias</b> | Selective reporting                  | None identified                                                                                                                                                                                                                                                                                                                             | Low |
| <b>Other bias</b>     | Anything else, ideally pre-specified | Significantly more patients in the usual care group had a history of CVD, and those in the usual care group classified their health status more often as moderate/poor. Significantly more patients in the pharmaceutical care group were prescribed atorvastatin, whereas fewer pharmaceutical care patients were prescribed rosuvastatin. |     |

Evans *et al.* 2010

| Bias domain             | Source of bias                         | Support for judgement                                                                                                                                                                                                                                                 | Review authors' judgement (low, unclear or high risk of bias) |
|-------------------------|----------------------------------------|-----------------------------------------------------------------------------------------------------------------------------------------------------------------------------------------------------------------------------------------------------------------------|---------------------------------------------------------------|
| <b>Selection bias</b>   | Random sequence generation             | Randomization lists were stratified by each physician and were created by using a table of random numbers in permuted blocks of 4. Randomization codes were kept in individually sealed envelopes and opened by the study pharmacist at the end of the initial visit. | Low                                                           |
|                         | Allocation concealment                 | Concealed ( sealed envelopes)                                                                                                                                                                                                                                         | Low                                                           |
| <b>Performance bias</b> | Blinding of participants and personnel | No attempt was made to blind any of the participants in the study.                                                                                                                                                                                                    | High                                                          |
| <b>Detection bias</b>   | Blinding of outcome assessment         | Not blinded                                                                                                                                                                                                                                                           | High                                                          |
| <b>Attrition bias</b>   | Incomplete outcome data                | All analyses were conducted with use of intent-to-treat.                                                                                                                                                                                                              | Low                                                           |
| <b>Reporting bias</b>   | Selective reporting                    | None identified                                                                                                                                                                                                                                                       | Low                                                           |
| <b>Other bias</b>       | Anything else, ideally pre-specified   | n/a                                                                                                                                                                                                                                                                   |                                                               |

Farber and Oliveira, 2004

| Bias domain             | Source of bias                         | Support for judgement                                                                                                                                  | Review authors' judgement (low, unclear or high risk of bias) |
|-------------------------|----------------------------------------|--------------------------------------------------------------------------------------------------------------------------------------------------------|---------------------------------------------------------------|
| <b>Selection bias</b>   | Random sequence generation             | "Random group assignments were generated and were placed in sequentially numbered opaque (manila) envelopes by someone not associated with the study." | Low                                                           |
|                         | Allocation concealment                 | Envelopes were not opened to reveal group assignments until informed consent was obtained and enrolment (baseline) interviews were completed."         | Low                                                           |
| <b>Performance bias</b> | Blinding of participants and personnel | Not possible due to the design of the intervention.                                                                                                    | High                                                          |
| <b>Detection bias</b>   | Blinding of outcome assessment         | "The telephone interviewer was blinded as to study group assignment."                                                                                  | Low                                                           |

|                       |                                      |                                              |     |
|-----------------------|--------------------------------------|----------------------------------------------|-----|
| <b>Attrition bias</b> | Incomplete outcome data              | “All data were analysed as intent to treat.” | Low |
| <b>Reporting bias</b> | Selective reporting                  | None identified                              | Low |
| <b>Other bias</b>     | Anything else, ideally pre-specified | n/a                                          |     |

Faulkner *et al.* 2000

| Bias domain             | Source of bias                         | Support for judgement                                        | Review authors' judgement (low, unclear or high risk of bias) |
|-------------------------|----------------------------------------|--------------------------------------------------------------|---------------------------------------------------------------|
| <b>Selection bias</b>   | Random sequence generation             | Randomised using a computer-generated list of random numbers | Low                                                           |
|                         | Allocation concealment                 | Computerized                                                 | Low                                                           |
| <b>Performance bias</b> | Blinding of participants and personnel | Not possible due to the design of the intervention.          | High                                                          |
| <b>Detection bias</b>   | Blinding of outcome assessment         | Insufficient information given                               | Unclear                                                       |
| <b>Attrition bias</b>   | Incomplete outcome data                | No patients lost to follow up                                | Low                                                           |
| <b>Reporting bias</b>   | Selective reporting                    | None identified                                              | Low                                                           |
| <b>Other bias</b>       | Anything else, ideally pre-specified   | n/a                                                          |                                                               |

Finley *et al.* 2003

| Bias domain             | Source of bias                         | Support for judgement                                                                           | Review authors' judgement (low, unclear or high risk of bias) |
|-------------------------|----------------------------------------|-------------------------------------------------------------------------------------------------|---------------------------------------------------------------|
| <b>Selection bias</b>   | Random sequence generation             | Sealed envelopes                                                                                | Low                                                           |
|                         | Allocation concealment                 | Envelopes were opened after the patients had finished a brief initial survey.                   | Low                                                           |
| <b>Performance bias</b> | Blinding of participants and personnel | No blinding                                                                                     | High                                                          |
| <b>Detection bias</b>   | Blinding of outcome assessment         | Insufficient information given                                                                  | Unclear                                                       |
| <b>Attrition bias</b>   | Incomplete outcome data                | Drug adherence values were compared in an intent-to-treat fashion. The other outcomes were not. | Unclear                                                       |
| <b>Reporting bias</b>   | Selective reporting                    | Not identified                                                                                  | Low                                                           |

|                   |                                      |     |
|-------------------|--------------------------------------|-----|
| <b>Other bias</b> | Anything else, ideally pre-specified | n/a |
|-------------------|--------------------------------------|-----|

Garcia-Cardenas *et al.* 2013

| Bias domain             | Source of bias                         | Support for judgement                                                                                                                                                                                                                                                                                                        | Review authors' judgement (low, unclear or high risk of bias) |
|-------------------------|----------------------------------------|------------------------------------------------------------------------------------------------------------------------------------------------------------------------------------------------------------------------------------------------------------------------------------------------------------------------------|---------------------------------------------------------------|
| <b>Selection bias</b>   | Random sequence generation             | "Pharmacies were the unit of randomization and were assigned by an independent researcher after they agreed to participate in the study to either intervention (IG) or control group (CG) using a computer-generated list of random numbers with ratio 1:1. Cluster randomization was used to minimize cross-contamination." | Low                                                           |
|                         | Allocation concealment                 | Computerized list, after agreeing to participate                                                                                                                                                                                                                                                                             | Low                                                           |
| <b>Performance bias</b> | Blinding of participants and personnel | "Given the nature of the intervention pharmacists or patients could not be blinded."                                                                                                                                                                                                                                         | High                                                          |
| <b>Detection bias</b>   | Blinding of outcome assessment         | Insufficient information given                                                                                                                                                                                                                                                                                               | Unclear                                                       |
| <b>Attrition bias</b>   | Incomplete outcome data                | "This analysis was repeated using an intention to treat approach (ITT) assuming a worst-case scenario (patients in the CG ended with controlled asthma and patient in the IG ended with uncontrolled asthma) for patients with missing outcomes data."                                                                       | Low                                                           |
| <b>Reporting bias</b>   | Selective reporting                    | None identified                                                                                                                                                                                                                                                                                                              | Low                                                           |
| <b>Other bias</b>       | Anything else, ideally pre-specified   | Percentage of uncontrolled patients, mean number of anti-asthmatic drugs and percentage of patients living in an urban area were significantly higher in the intervention group (P=0.005, P=0.038 and P<0.001 respectively).                                                                                                 |                                                               |

Garnett *et al.* 1981

| Bias domain             | Source of bias                         | Support for judgement                                         | Review authors' judgement (low, unclear or high risk of bias) |
|-------------------------|----------------------------------------|---------------------------------------------------------------|---------------------------------------------------------------|
| <b>Selection bias</b>   | Random sequence generation             | Stepwise coin-toss, 101 patients.                             | Low                                                           |
|                         | Allocation concealment                 | Concealed in the first step, but unclear in the second step.  | Unclear                                                       |
| <b>Performance bias</b> | Blinding of participants and personnel | Not possible due to the design of the intervention            | High                                                          |
| <b>Detection bias</b>   | Blinding of outcome assessment         | No information given                                          | Unclear                                                       |
| <b>Attrition bias</b>   | Incomplete outcome data                | Ca. 20% dropouts. Not taken in consideration, just mentioned. | High                                                          |

|                       |                                      |                 |     |
|-----------------------|--------------------------------------|-----------------|-----|
| <b>Reporting bias</b> | Selective reporting                  | None identified | Low |
| <b>Other bias</b>     | Anything else, ideally pre-specified | n/a             |     |

Geurtz *et al.* 2010

| Bias domain             | Source of bias                         | Support for judgement                                                                                                                                                                                                                                                                                               | Review authors' judgement (low, unclear or high risk of bias) |
|-------------------------|----------------------------------------|---------------------------------------------------------------------------------------------------------------------------------------------------------------------------------------------------------------------------------------------------------------------------------------------------------------------|---------------------------------------------------------------|
| <b>Selection bias</b>   | Random sequence generation             | When patients were included according to the inclusion criteria they were randomised by the pharmacy computer system in the intervention or control group. Patients with an even number were included in the intervention group; patients with an odd number were included in the control group.                    | Low                                                           |
|                         | Allocation concealment                 | Computerized                                                                                                                                                                                                                                                                                                        | Low                                                           |
| <b>Performance bias</b> | Blinding of participants and personnel | Not possible due to the design of the intervention                                                                                                                                                                                                                                                                  | High                                                          |
| <b>Detection bias</b>   | Blinding of outcome assessment         | Insufficient information given                                                                                                                                                                                                                                                                                      | Unclear                                                       |
| <b>Attrition bias</b>   | Incomplete outcome data                | “The response rate for the patient questionnaire was 45% in the intervention group and 41% in the control group. Patients who did not return the questionnaire were excluded”.<br>“Only the questionnaires from patients who filled in the right drug name were analysed.”<br>Not mentioned further in the results. | High                                                          |
| <b>Reporting bias</b>   | Selective reporting                    | Results from questionnaire regarding patient satisfaction were missing. And a lot of the results seem to be excluded for different reasons.                                                                                                                                                                         | High                                                          |
| <b>Other bias</b>       | Anything else, ideally pre-specified   | n/a                                                                                                                                                                                                                                                                                                                 |                                                               |

Grant *et al.* 2003

| Bias domain             | Source of bias                         | Support for judgement                              | Review authors' judgement (low, unclear or high risk of bias) |
|-------------------------|----------------------------------------|----------------------------------------------------|---------------------------------------------------------------|
| <b>Selection bias</b>   | Random sequence generation             | No information given                               | Unclear                                                       |
|                         | Allocation concealment                 | No information given                               | Unclear                                                       |
| <b>Performance bias</b> | Blinding of participants and personnel | Not possible due to the design of the intervention | High                                                          |
| <b>Detection bias</b>   | Blinding of outcome assessment         | No information given                               | Unclear                                                       |

|                       |                                      |                                                                                                                                                |      |
|-----------------------|--------------------------------------|------------------------------------------------------------------------------------------------------------------------------------------------|------|
| <b>Attrition bias</b> | Incomplete outcome data              | Results of the dropouts were not mentioned                                                                                                     | High |
| <b>Reporting bias</b> | Selective reporting                  | None identified                                                                                                                                | Low  |
| <b>Other bias</b>     | Anything else, ideally pre-specified | Among the subset of patients completing the study, control patients were somewhat older than intervention patients but otherwise very similar. |      |

Gymonpre *et al.* 2001

| Bias domain             | Source of bias                         | Support for judgement                                                                                     | Review authors' judgement (low, unclear or high risk of bias) |
|-------------------------|----------------------------------------|-----------------------------------------------------------------------------------------------------------|---------------------------------------------------------------|
| <b>Selection bias</b>   | Random sequence generation             | "Using a computer generated randomisation list, clients were assigned to either a test or control group." | Low                                                           |
|                         | Allocation concealment                 | Concealed<br>"All clients were informed, in a letter, of their allocation"                                | Low                                                           |
| <b>Performance bias</b> | Blinding of participants and personnel | Not possible due to the design of the intervention                                                        | High                                                          |
| <b>Detection bias</b>   | Blinding of outcome assessment         | Not described                                                                                             | Unclear                                                       |
| <b>Attrition bias</b>   | Incomplete outcome data                | Only 73% of the patients completed the study. Results of dropouts were not mentioned.                     | High                                                          |
| <b>Reporting bias</b>   | Selective reporting                    | None identified                                                                                           | Low                                                           |
| <b>Other bias</b>       | Anything else, ideally pre-specified   | n/a                                                                                                       |                                                               |

Hamann *et al.* 2007

| Bias domain             | Source of bias                         | Support for judgement                                                                                                                                                                                        | Review authors' judgement (low, unclear or high risk of bias) |
|-------------------------|----------------------------------------|--------------------------------------------------------------------------------------------------------------------------------------------------------------------------------------------------------------|---------------------------------------------------------------|
| <b>Selection bias</b>   | Random sequence generation             | Not described                                                                                                                                                                                                | Unclear                                                       |
|                         | Allocation concealment                 | Not described                                                                                                                                                                                                | Unclear                                                       |
| <b>Performance bias</b> | Blinding of participants and personnel | Not possible due to the design of the intervention                                                                                                                                                           | High                                                          |
| <b>Detection bias</b>   | Blinding of outcome assessment         | Insufficient information given                                                                                                                                                                               | Unclear                                                       |
| <b>Attrition bias</b>   | Incomplete outcome data                | "there were no differences between dropouts of the intervention or control groups with respect to patients' age, gender, duration of illness, or PANSS score at discharge (6- and 18-month data, $P>0.05$ ). | Low                                                           |

|                       |                                      |                 |     |
|-----------------------|--------------------------------------|-----------------|-----|
| <b>Reporting bias</b> | Selective reporting                  | None identified | Low |
| <b>Other bias</b>     | Anything else, ideally pre-specified | n/a             |     |

Hanlon *et al.* 1996

| Bias domain             | Source of bias                         | Support for judgement                                                                                                                          | Review authors' judgement (low, unclear or high risk of bias) |
|-------------------------|----------------------------------------|------------------------------------------------------------------------------------------------------------------------------------------------|---------------------------------------------------------------|
| <b>Selection bias</b>   | Random sequence generation             | 208 remaining patients were randomized to either the control or intervention group using a computer-generated scheme.                          | Low                                                           |
|                         | Allocation concealment                 | Not concealed                                                                                                                                  | Low                                                           |
| <b>Performance bias</b> | Blinding of participants and personnel | Not possible due to the design of the intervention                                                                                             | High                                                          |
| <b>Detection bias</b>   | Blinding of outcome assessment         | Closeout telephone interviews were conducted 11.5 to 13 months after randomization by another clinical pharmacist blinded to group assignment. | Low                                                           |
| <b>Attrition bias</b>   | Incomplete outcome data                | An 'intention to treat" approach was utilized and thus all patients were retained in the analyses.                                             | Low                                                           |
| <b>Reporting bias</b>   | Selective reporting                    | None identified                                                                                                                                | Low                                                           |
| <b>Other bias</b>       | Anything else, ideally pre-specified   | n/a                                                                                                                                            |                                                               |

Hawkins *et al.* 1979

| Bias domain             | Source of bias                         | Support for judgement                                                                                                                                                                | Review authors' judgement (low, unclear or high risk of bias) |
|-------------------------|----------------------------------------|--------------------------------------------------------------------------------------------------------------------------------------------------------------------------------------|---------------------------------------------------------------|
| <b>Selection bias</b>   | Random sequence generation             | Not described                                                                                                                                                                        | Unclear                                                       |
|                         | Allocation concealment                 | Not described                                                                                                                                                                        | Unclear                                                       |
| <b>Performance bias</b> | Blinding of participants and personnel | Not possible due to the design of the intervention                                                                                                                                   | High                                                          |
| <b>Detection bias</b>   | Blinding of outcome assessment         | Not described                                                                                                                                                                        | Unclear                                                       |
| <b>Attrition bias</b>   | Incomplete outcome data                | High rate of dropouts                                                                                                                                                                | High                                                          |
| <b>Reporting bias</b>   | Selective reporting                    | None identified                                                                                                                                                                      | Low                                                           |
| <b>Other bias</b>       | Anything else, ideally pre-specified   | The control group contained a higher percentage of patients with hypertension as an only diagnosis. A higher percentage of intervention patients had both hypertension and diabetes. |                                                               |

Hederos *et al.* 2005

| Bias domain             | Source of bias                         | Support for judgement                                                                                                                                                                                             | Review authors' judgement (low, unclear or high risk of bias) |
|-------------------------|----------------------------------------|-------------------------------------------------------------------------------------------------------------------------------------------------------------------------------------------------------------------|---------------------------------------------------------------|
| <b>Selection bias</b>   | Random sequence generation             | Not described                                                                                                                                                                                                     | Unclear                                                       |
|                         | Allocation concealment                 | Not described                                                                                                                                                                                                     | Unclear                                                       |
| <b>Performance bias</b> | Blinding of participants and personnel | “The nurses carried out the randomization and the three doctors that were involved in the group sessions also performed the follow-up visits. Therefore, a complete blinding procedure could not be established.” | High                                                          |
| <b>Detection bias</b>   | Blinding of outcome assessment         | Not described                                                                                                                                                                                                     | Unclear                                                       |
| <b>Attrition bias</b>   | Incomplete outcome data                | “The follow-up rate was thus 86% in the control group, 91% in the intervention group and 88% for the total cohort after 18 mo. The groups were well matched except for pet ownership.”                            | Unclear                                                       |
| <b>Reporting bias</b>   | Selective reporting                    | None identified                                                                                                                                                                                                   | Low                                                           |
| <b>Other bias</b>       | Anything else, ideally pre-specified   | In the intervention group, 47% of the children had animals at home compared to only 18% in the control group.                                                                                                     |                                                               |

Heisler *et al.* 2012

| Bias domain             | Source of bias                         | Support for judgement                              | Review authors' judgement (low, unclear or high risk of bias) |
|-------------------------|----------------------------------------|----------------------------------------------------|---------------------------------------------------------------|
| <b>Selection bias</b>   | Random sequence generation             | Not described                                      | Unclear                                                       |
|                         | Allocation concealment                 | Not described                                      | Unclear                                                       |
| <b>Performance bias</b> | Blinding of participants and personnel | Not possible due to the design of the intervention | High                                                          |
| <b>Detection bias</b>   | Blinding of outcome assessment         | Not described                                      | Unclear                                                       |
| <b>Attrition bias</b>   | Incomplete outcome data                | intention-to-treat analyses                        | Low                                                           |
| <b>Reporting bias</b>   | Selective reporting                    | None identified                                    | Low                                                           |
| <b>Other bias</b>       | Anything else, ideally pre-specified   | n/a                                                |                                                               |

Holland *et al.* 2007

| Bias domain             | Source of bias                         | Support for judgement                                                                                                                                                                                                                                                               | Review authors' judgement (low, unclear or high risk of bias) |
|-------------------------|----------------------------------------|-------------------------------------------------------------------------------------------------------------------------------------------------------------------------------------------------------------------------------------------------------------------------------------|---------------------------------------------------------------|
| <b>Selection bias</b>   | Random sequence generation             | "We used third party telephone randomisation based on a computer generated random allocation sequence. We stratified randomisation by New York Heart Association class (class I/II—no or mild limitation, III—moderate limitation, or IV— severe limitation) and recruitment site." | Low                                                           |
|                         | Allocation concealment                 | Not described                                                                                                                                                                                                                                                                       | Unclear                                                       |
| <b>Performance bias</b> | Blinding of participants and personnel | The nature of the intervention meant that no clear "placebo" could be provided. Participants were told after randomisation which group they were in. Those in the control group received usual care.                                                                                | High                                                          |
| <b>Detection bias</b>   | Blinding of outcome assessment         | Not described                                                                                                                                                                                                                                                                       | Unclear                                                       |
| <b>Attrition bias</b>   | Incomplete outcome data                | Quite high rate of dropouts that are not mentioned in the results                                                                                                                                                                                                                   | High                                                          |
| <b>Reporting bias</b>   | Selective reporting                    | None identified                                                                                                                                                                                                                                                                     | Low                                                           |
| <b>Other bias</b>       | Anything else, ideally pre-specified   | Intervention participants more often used some form of drug adherence aid (27% v 16%).                                                                                                                                                                                              |                                                               |

Hunt *et al.* 2008

| Bias domain             | Source of bias                         | Support for judgement                                                                                                                                                                                       | Review authors' judgement (low, unclear or high risk of bias) |
|-------------------------|----------------------------------------|-------------------------------------------------------------------------------------------------------------------------------------------------------------------------------------------------------------|---------------------------------------------------------------|
| <b>Selection bias</b>   | Random sequence generation             | At the time consent was received by research staff, subjects were randomly assigned, with equal allocation and without restrictions, to intervention or control using a computer-generated random sequence. | Low                                                           |
|                         | Allocation concealment                 | Computerized                                                                                                                                                                                                | Low                                                           |
| <b>Performance bias</b> | Blinding of participants and personnel | Based on the nature of the intervention, participant blinding was not possible.                                                                                                                             | High                                                          |
| <b>Detection bias</b>   | Blinding of outcome assessment         | At study end, subjects attended open clinic sessions in which blood pressure was assessed by registered nurses blinded to subjects' randomization allocation.                                               | Low                                                           |
|                         |                                        | Patient self-management knowledge and behaviour measures were assessed by a self-administered questionnaire completed at baseline and exit study visit.                                                     |                                                               |
|                         |                                        | Assessment of medication adherence consisted of four validated patient self-reported questions.                                                                                                             |                                                               |
|                         |                                        | Healthcare utilization information was collected by chart audit during the period of time from subject consent through the date of the exit visit.                                                          |                                                               |
|                         |                                        | Subjects' health status was evaluated at the exit visit using the Medical Outcomes Study SF-36 survey                                                                                                       |                                                               |

|                       |                                      |                                                                                                                                                                                                                                                                                                                                                 |     |
|-----------------------|--------------------------------------|-------------------------------------------------------------------------------------------------------------------------------------------------------------------------------------------------------------------------------------------------------------------------------------------------------------------------------------------------|-----|
|                       |                                      | reporting scaled results for the eight domains, as well as physical and mental health composite scores.                                                                                                                                                                                                                                         |     |
| <b>Attrition bias</b> | Incomplete outcome data              | Of subjects unavailable at the exit visit, all had documented blood pressures in the chart, with the exception of seven subjects (n=4 control; n=3 intervention), in which case the last clinic blood pressures were carried forward. Detailed analyses published elsewhere demonstrate that the groups remained comparable despite withdrawal. | Low |
| <b>Reporting bias</b> | Selective reporting                  | None identified                                                                                                                                                                                                                                                                                                                                 | Low |
| <b>Other bias</b>     | Anything else, ideally pre-specified | Intervention patients had a greater history of stroke than the control patients.                                                                                                                                                                                                                                                                |     |

Iram *et al.* 2010

| Bias domain             | Source of bias                         | Support for judgement                                                                                                                         | Review authors' judgement (low, unclear or high risk of bias) |
|-------------------------|----------------------------------------|-----------------------------------------------------------------------------------------------------------------------------------------------|---------------------------------------------------------------|
| <b>Selection bias</b>   | Random sequence generation             | Chit method                                                                                                                                   | Low                                                           |
|                         | Allocation concealment                 | Chit method                                                                                                                                   | Low                                                           |
| <b>Performance bias</b> | Blinding of participants and personnel | Not possible due to the design of the intervention                                                                                            | High                                                          |
| <b>Detection bias</b>   | Blinding of outcome assessment         | Not described                                                                                                                                 | Unclear                                                       |
| <b>Attrition bias</b>   | Incomplete outcome data                | HbA1c was only tested on 25 (16 intervention and 9 control) out of 98 (53 intervention and 45 control) patients due to financial constraints. | High                                                          |
| <b>Reporting bias</b>   | Selective reporting                    | None identified                                                                                                                               | Low                                                           |
| <b>Other bias</b>       | Anything else, ideally pre-specified   | n/a                                                                                                                                           |                                                               |

Jacobs *et al.* 2012

| Bias domain             | Source of bias                         | Support for judgement                                                                                                                            | Review authors' judgement (low, unclear or high risk of bias) |
|-------------------------|----------------------------------------|--------------------------------------------------------------------------------------------------------------------------------------------------|---------------------------------------------------------------|
| <b>Selection bias</b>   | Random sequence generation             | Eligible patients were randomized to either an intervention or control group using a computer randomized sequence of ones and zeroes.            | Low                                                           |
|                         | Allocation concealment                 | Computerized, but made before enrolment.                                                                                                         | Unclear                                                       |
| <b>Performance bias</b> | Blinding of participants and personnel | Primary care physicians were unaware of which patients were randomized to the control group, but were informed of which were in the intervention | High                                                          |

|                       |                                      |                                                                                                                                        |         |
|-----------------------|--------------------------------------|----------------------------------------------------------------------------------------------------------------------------------------|---------|
|                       |                                      | group, due to approval requirements.<br>Not possible to blind patients.                                                                |         |
| <b>Detection bias</b> | Blinding of outcome assessment       | Not described                                                                                                                          | Unclear |
| <b>Attrition bias</b> | Incomplete outcome data              | No dropouts mentioned. Seem like no patients were lost to follow up.                                                                   | Low     |
| <b>Reporting bias</b> | Selective reporting                  | None identified                                                                                                                        | Low     |
| <b>Other bias</b>     | Anything else, ideally pre-specified | Mean BMI values were slightly higher larger in the intervention group at baseline than for patients in the control group ( $P<0.05$ ). |         |

Jarab *et al.* 2012

| Bias domain             | Source of bias                         | Support for judgement                                                                                                          | Review authors' judgement (low, unclear or high risk of bias) |
|-------------------------|----------------------------------------|--------------------------------------------------------------------------------------------------------------------------------|---------------------------------------------------------------|
| <b>Selection bias</b>   | Random sequence generation             | Study participants were randomly assigned to intervention and control groups via a minimisation technique using MINIM software | Low                                                           |
|                         | Allocation concealment                 | Concealed                                                                                                                      | Low                                                           |
| <b>Performance bias</b> | Blinding of participants and personnel | Not possible due to the design of the intervention                                                                             | High                                                          |
| <b>Detection bias</b>   | Blinding of outcome assessment         | Not described                                                                                                                  | Unclear                                                       |
| <b>Attrition bias</b>   | Incomplete outcome data                | Low dropout rate (only 6 patients)                                                                                             | Low                                                           |
| <b>Reporting bias</b>   | Selective reporting                    | None identified                                                                                                                | Low                                                           |
| <b>Other bias</b>       | Anything else, ideally pre-specified   | n/a                                                                                                                            |                                                               |

Jarab *et al.* 2012

| Bias domain             | Source of bias                         | Support for judgement                                                                                                          | Review authors' judgement (low, unclear or high risk of bias) |
|-------------------------|----------------------------------------|--------------------------------------------------------------------------------------------------------------------------------|---------------------------------------------------------------|
| <b>Selection bias</b>   | Random sequence generation             | Study participants were randomly assigned to intervention and control groups via a minimization technique using Minim software | Low                                                           |
|                         | Allocation concealment                 | Concealed                                                                                                                      | Low                                                           |
| <b>Performance bias</b> | Blinding of participants and personnel | Not possible due to the design of the intervention                                                                             | High                                                          |

|                       |                                      |                                                                                                                  |         |
|-----------------------|--------------------------------------|------------------------------------------------------------------------------------------------------------------|---------|
| <b>Detection bias</b> | Blinding of outcome assessment       | Performed by the researchers. Not described if they're blinded or not.                                           | Unclear |
| <b>Attrition bias</b> | Incomplete outcome data              | Number of 15 patients dropped out (total 171 patients). Demographics compared for all 171 showed no differences. | Low     |
| <b>Reporting bias</b> | Selective reporting                  | None identified                                                                                                  | Low     |
| <b>Other bias</b>     | Anything else, ideally pre-specified | n/a                                                                                                              |         |

Kelly *et al.* 1988

| Bias domain             | Source of bias                         | Support for judgement                                                                                                     | Review authors' judgement (low, unclear or high risk of bias) |
|-------------------------|----------------------------------------|---------------------------------------------------------------------------------------------------------------------------|---------------------------------------------------------------|
| <b>Selection bias</b>   | Random sequence generation             | Sealed envelopes were given to the physicians to open at random after identifying a patient who fit the study guidelines. | Low                                                           |
|                         | Allocation concealment                 | Concealed                                                                                                                 | Low                                                           |
| <b>Performance bias</b> | Blinding of participants and personnel | Not possible due to the design of the intervention                                                                        | High                                                          |
| <b>Detection bias</b>   | Blinding of outcome assessment         | Not described                                                                                                             | Unclear                                                       |
| <b>Attrition bias</b>   | Incomplete outcome data                | 6 patients out of 44 were excluded. These were not commented further.                                                     | Unclear                                                       |
| <b>Reporting bias</b>   | Selective reporting                    | None identified                                                                                                           | Low                                                           |
| <b>Other bias</b>       | Anything else, ideally pre-specified   | n/a                                                                                                                       |                                                               |

Klein *et al.* 2009

| Bias domain             | Source of bias                         | Support for judgement                              | Review authors' judgement (low, unclear or high risk of bias) |
|-------------------------|----------------------------------------|----------------------------------------------------|---------------------------------------------------------------|
| <b>Selection bias</b>   | Random sequence generation             | Not described                                      | Unclear                                                       |
|                         | Allocation concealment                 | Not described                                      | Unclear                                                       |
| <b>Performance bias</b> | Blinding of participants and personnel | Not possible due to the design of the intervention | High                                                          |

|                       |                                      |                                                                                           |         |
|-----------------------|--------------------------------------|-------------------------------------------------------------------------------------------|---------|
| <b>Detection bias</b> | Blinding of outcome assessment       | Not described                                                                             | Unclear |
| <b>Attrition bias</b> | Incomplete outcome data              | 18% dropouts. Demographics were compared for all patients, and no differences were found. | Low     |
| <b>Reporting bias</b> | Selective reporting                  | None identified                                                                           | Low     |
| <b>Other bias</b>     | Anything else, ideally pre-specified | n/a                                                                                       |         |

Kumar *et al.* 2009

| Bias domain             | Source of bias                         | Support for judgement                              | Review authors' judgement (low, unclear or high risk of bias) |
|-------------------------|----------------------------------------|----------------------------------------------------|---------------------------------------------------------------|
| <b>Selection bias</b>   | Random sequence generation             | Not described                                      | Unclear                                                       |
|                         | Allocation concealment                 | Not described                                      | Unclear                                                       |
| <b>Performance bias</b> | Blinding of participants and personnel | Not possible due to the design of the intervention | High                                                          |
| <b>Detection bias</b>   | Blinding of outcome assessment         | Not described                                      | Unclear                                                       |
| <b>Attrition bias</b>   | Incomplete outcome data                | Low dropout rate                                   | Low                                                           |
| <b>Reporting bias</b>   | Selective reporting                    | None identified                                    | Low                                                           |
| <b>Other bias</b>       | Anything else, ideally pre-specified   | n/a                                                |                                                               |

Lai *et al.* 2011

| Bias domain           | Source of bias             | Support for judgement                                                                                                                                                                                                                                                                                                                                                                                                           | Review authors' judgement (low, unclear or high risk of bias) |
|-----------------------|----------------------------|---------------------------------------------------------------------------------------------------------------------------------------------------------------------------------------------------------------------------------------------------------------------------------------------------------------------------------------------------------------------------------------------------------------------------------|---------------------------------------------------------------|
| <b>Selection bias</b> | Random sequence generation | This study used a stratified block randomization design to ensure that the number of participants on alendronate and risedronate in the control and intervention group were the same. Therefore, participants were first divided into whether they were on alendronate or risedronate, and then randomly allocated to the intervention group using the random digits table, while the rest were allocated to the control group. | Low                                                           |
|                       | Allocation concealment     | Not described                                                                                                                                                                                                                                                                                                                                                                                                                   | Unclear                                                       |

|                         |                                        |                                                                                                                                                                            |      |
|-------------------------|----------------------------------------|----------------------------------------------------------------------------------------------------------------------------------------------------------------------------|------|
| <b>Performance bias</b> | Blinding of participants and personnel | Not possible due to the design of the intervention                                                                                                                         | High |
| <b>Detection bias</b>   | Blinding of outcome assessment         | An independent research assistant collected the data on medication adherence to minimize pharmacist interaction with control participants and to reduce intervention bias. | Low  |
| <b>Attrition bias</b>   | Incomplete outcome data                | About 10 % dropouts. Demographics compared, and no significant differences found.                                                                                          | Low  |
| <b>Reporting bias</b>   | Selective reporting                    | None identified                                                                                                                                                            | Low  |
| <b>Other bias</b>       | Anything else, ideally pre-specified   | n/a                                                                                                                                                                        |      |

Lantz *et al.* 1995

| Bias domain             | Source of bias                         | Support for judgement                                                                                                                                                                                                                                                                                                             | Review authors' judgement (low, unclear or high risk of bias) |
|-------------------------|----------------------------------------|-----------------------------------------------------------------------------------------------------------------------------------------------------------------------------------------------------------------------------------------------------------------------------------------------------------------------------------|---------------------------------------------------------------|
| <b>Selection bias</b>   | Random sequence generation             | Randomly assigned to an intervention or control group based on the penultimate digit of their medical history number.                                                                                                                                                                                                             | High                                                          |
|                         | Allocation concealment                 | Not concealed                                                                                                                                                                                                                                                                                                                     | High                                                          |
| <b>Performance bias</b> | Blinding of participants and personnel | Not possible due to the design of the intervention                                                                                                                                                                                                                                                                                | High                                                          |
| <b>Detection bias</b>   | Blinding of outcome assessment         | Not described                                                                                                                                                                                                                                                                                                                     | Unclear                                                       |
| <b>Attrition bias</b>   | Incomplete outcome data                | Ten per cent (n = 33) of women assigned to the intervention group were deemed inappropriate study subjects by their physicians and therefore did not receive the intervention. These women were included in the analysis, however, since similar criteria for exclusion could not be identified among women in the control group. | Low                                                           |
| <b>Reporting bias</b>   | Selective reporting                    | None identified                                                                                                                                                                                                                                                                                                                   | Low                                                           |
| <b>Other bias</b>       | Anything else, ideally pre-specified   | n/a                                                                                                                                                                                                                                                                                                                               |                                                               |

Lee *et al.* 1999

| Bias domain           | Source of bias             | Support for judgement                                                                                                                             | Review authors' judgement (low, unclear or high risk of bias) |
|-----------------------|----------------------------|---------------------------------------------------------------------------------------------------------------------------------------------------|---------------------------------------------------------------|
| <b>Selection bias</b> | Random sequence generation | Patients were randomized at each health centre by the study pharmacist to either the control group or the ECP group my means of sealed envelopes. | Low                                                           |
|                       | Allocation concealment     | Concealed ( sealed envelopes)                                                                                                                     | Low                                                           |

|                         |                                        |                                                     |      |
|-------------------------|----------------------------------------|-----------------------------------------------------|------|
| <b>Performance bias</b> | Blinding of participants and personnel | Not possible due to the design of the intervention. | High |
| <b>Detection bias</b>   | Blinding of outcome assessment         | Not blinded                                         | High |
| <b>Attrition bias</b>   | Incomplete outcome data                | Two intention-to-treat analyses were performed      | Low  |
| <b>Reporting bias</b>   | Selective reporting                    | None identified                                     | Low  |
| <b>Other bias</b>       | Anything else, ideally pre-specified   | n/a                                                 |      |

Lee *et al.* 2004

| Bias domain             | Source of bias                         | Support for judgement                                                                                                                                                                                                                           | Review authors' judgement (low, unclear or high risk of bias) |
|-------------------------|----------------------------------------|-------------------------------------------------------------------------------------------------------------------------------------------------------------------------------------------------------------------------------------------------|---------------------------------------------------------------|
| <b>Selection bias</b>   | Random sequence generation             | Patients were assigned either to the individualized group or control group based on alternating days of the week in which they were seen at the hospital clinic.                                                                                | High                                                          |
|                         | Allocation concealment                 | Not concealed. Depending on day of the week                                                                                                                                                                                                     | High                                                          |
| <b>Performance bias</b> | Blinding of participants and personnel | The physicians were blinded so that they did not know the group assignment of each patient, and both groups received the same standard medical care.<br>The pharmacist and patients could not be blinded due to the design of the intervention. | High                                                          |
| <b>Detection bias</b>   | Blinding of outcome assessment         | Lipid levels were measured by the same pharmacist, but the rest is not described.                                                                                                                                                               | Unclear                                                       |
| <b>Attrition bias</b>   | Incomplete outcome data                | Nine dropouts. Not mentioned further, or taken in consideration.                                                                                                                                                                                | High                                                          |
| <b>Reporting bias</b>   | Selective reporting                    | None identified                                                                                                                                                                                                                                 | Low                                                           |
| <b>Other bias</b>       | Anything else, ideally pre-specified   | n/a                                                                                                                                                                                                                                             |                                                               |

Lim *et al.* 2004

| Bias domain           | Source of bias             | Support for judgement                                                                                                                                                                                    | Review authors' judgement (low, unclear or high risk of bias) |
|-----------------------|----------------------------|----------------------------------------------------------------------------------------------------------------------------------------------------------------------------------------------------------|---------------------------------------------------------------|
| <b>Selection bias</b> | Random sequence generation | All eligible patients were randomly assigned into intervention or control groups using computer-generated numbers and in blocks of 2.                                                                    | Low                                                           |
|                       | Allocation concealment     | Randomisation was carried out before consent following Zelen's design (reference), as compared to the conventional design of consent-randomisation. This to minimise the Hawthorne effect in the control | Unclear                                                       |

|                         |                                        |                                                                                                                                                                                                                                                                                      |         |
|-------------------------|----------------------------------------|--------------------------------------------------------------------------------------------------------------------------------------------------------------------------------------------------------------------------------------------------------------------------------------|---------|
|                         |                                        | group and to reduce disappointment bias which can significantly affect endpoints such as knowledge, compliance and perception.                                                                                                                                                       |         |
| <b>Performance bias</b> | Blinding of participants and personnel | Not possible due to the design of the intervention                                                                                                                                                                                                                                   | High    |
| <b>Detection bias</b>   | Blinding of outcome assessment         | Blinded investigator                                                                                                                                                                                                                                                                 | Low     |
| <b>Attrition bias</b>   | Incomplete outcome data                | There was a dropout rate of 20.6%. All patients' demographics were compared and there were no differences between the groups.                                                                                                                                                        | Unclear |
| <b>Reporting bias</b>   | Selective reporting                    | None identified                                                                                                                                                                                                                                                                      | Low     |
| <b>Other bias</b>       | Anything else, ideally pre-specified   | Patients in the intervention group were more likely to visit their physician (P=0.08) and relied more on taking medications according to mealtimes (P=0.06) than the control group at baseline. A greater percentage of patients in the control group were totally dependent in ADL. |         |

Zelen's reference: Patients in the first group receive standard treatment; those in the second group are asked if they will accept the experimental therapy; if they decline, they receive the best standard treatment. In the analyses of results, all those in the second group, regardless of treatment, are compared with those in the first group.

Lipton *et al.* 1994

| Bias domain             | Source of bias                         | Support for judgement                                                                                                                                                                                                                     | Review authors' judgement (low, unclear or high risk of bias) |
|-------------------------|----------------------------------------|-------------------------------------------------------------------------------------------------------------------------------------------------------------------------------------------------------------------------------------------|---------------------------------------------------------------|
| <b>Selection bias</b>   | Random sequence generation             | Upon consent, patients were randomly assigned into the experimental or control group through a process by which the patient drew a folded slip of paper from a box containing equal numbers of experimental and control-designated slips. | High                                                          |
|                         | Allocation concealment                 | Concealed                                                                                                                                                                                                                                 | Low                                                           |
| <b>Performance bias</b> | Blinding of participants and personnel | Not possible due to the design of the intervention                                                                                                                                                                                        | High                                                          |
| <b>Detection bias</b>   | Blinding of outcome assessment         | Each of the two interviewers was blinded to the study group assignment of the patient.                                                                                                                                                    | Low                                                           |
| <b>Attrition bias</b>   | Incomplete outcome data                | No one lost to follow up                                                                                                                                                                                                                  | Low                                                           |
| <b>Reporting bias</b>   | Selective reporting                    | None identified                                                                                                                                                                                                                           | Low                                                           |
| <b>Other bias</b>       | Anything else, ideally pre-specified   | n/a                                                                                                                                                                                                                                       |                                                               |

Lopez Cabezas *et al.* 2006

| Bias domain | Source of bias | Support for judgement | Review authors' judgement (low, unclear or high risk of bias) |
|-------------|----------------|-----------------------|---------------------------------------------------------------|
|-------------|----------------|-----------------------|---------------------------------------------------------------|

|                         |                                        |                                                                                                                                                                                                                                                                                                       |      |
|-------------------------|----------------------------------------|-------------------------------------------------------------------------------------------------------------------------------------------------------------------------------------------------------------------------------------------------------------------------------------------------------|------|
| <b>Selection bias</b>   | Random sequence generation             | The patients were randomized to one of the two groups through a randomization software. Lists were generated in blocks of 4 to assure a consistent patient distribution in both groups.                                                                                                               | Low  |
|                         | Allocation concealment                 | The control of allocation to each group was performed by the admission department and patient recruitment was carried out by the cardiology department. Neither the physician nor the nurse responsible for the patient knew the allocation until the educational intervention, the day of discharge. | Low  |
| <b>Performance bias</b> | Blinding of participants and personnel | Not blinded during the study, only at patient randomisation.                                                                                                                                                                                                                                          | High |
| <b>Detection bias</b>   | Blinding of outcome assessment         | Done by the intervention pharmacist. Not blinded.                                                                                                                                                                                                                                                     | High |
| <b>Attrition bias</b>   | Incomplete outcome data                | No one lost to follow up                                                                                                                                                                                                                                                                              | Low  |
| <b>Reporting bias</b>   | Selective reporting                    | None identified                                                                                                                                                                                                                                                                                       | Low  |
| <b>Other bias</b>       | Anything else, ideally pre-specified   | Both study groups were comparable with regard to the primary clinical variables, such as functional class, previous admissions or underlying heart disease, though the intervention group had globally a slightly higher ejection fraction than the control group ( $p < 0.05$ ).                     |      |

Ma *et al.* 2010

| Bias domain             | Source of bias                         | Support for judgement                                                                       | Review authors' judgement (low, unclear or high risk of bias) |
|-------------------------|----------------------------------------|---------------------------------------------------------------------------------------------|---------------------------------------------------------------|
| <b>Selection bias</b>   | Random sequence generation             | Not described                                                                               | Unclear                                                       |
|                         | Allocation concealment                 | Randomization was conducted by a statistician who was not involved with the intervention.   | Low                                                           |
| <b>Performance bias</b> | Blinding of participants and personnel | Not possible due to the design of the intervention                                          | High                                                          |
| <b>Detection bias</b>   | Blinding of outcome assessment         | Not described                                                                               | Unclear                                                       |
| <b>Attrition bias</b>   | Incomplete outcome data                | A total of 559 (81%) had complete pharmacy records and were included in the final analysis. | Unclear                                                       |
| <b>Reporting bias</b>   | Selective reporting                    | None identified                                                                             | Low                                                           |
| <b>Other bias</b>       | Anything else, ideally pre-specified   | n/a                                                                                         |                                                               |

McLean *et al.* 2003

| Bias domain             | Source of bias                         | Support for judgement                              | Review authors' judgement (low, unclear or high risk of bias) |
|-------------------------|----------------------------------------|----------------------------------------------------|---------------------------------------------------------------|
| <b>Selection bias</b>   | Random sequence generation             | Coin toss                                          | High                                                          |
|                         | Allocation concealment                 | Not concealed                                      | High                                                          |
| <b>Performance bias</b> | Blinding of participants and personnel | Not possible due to the design of the intervention | High                                                          |
| <b>Detection bias</b>   | Blinding of outcome assessment         | Not described                                      | Unclear                                                       |
| <b>Attrition bias</b>   | Incomplete outcome data                | Quite high rate of dropouts                        | High                                                          |
| <b>Reporting bias</b>   | Selective reporting                    | None identified                                    | Low                                                           |
| <b>Other bias</b>       | Anything else, ideally pre-specified   | n/a                                                |                                                               |

Mehos *et al.* 2000

| Bias domain             | Source of bias                         | Support for judgement                                                                                  | Review authors' judgement (low, unclear or high risk of bias) |
|-------------------------|----------------------------------------|--------------------------------------------------------------------------------------------------------|---------------------------------------------------------------|
| <b>Selection bias</b>   | Random sequence generation             | Randomised using a deck of cards                                                                       | High                                                          |
|                         | Allocation concealment                 | Concealed                                                                                              | Low                                                           |
| <b>Performance bias</b> | Blinding of participants and personnel | Not possible due to the design of the intervention                                                     | High                                                          |
| <b>Detection bias</b>   | Blinding of outcome assessment         | Not described                                                                                          | Unclear                                                       |
| <b>Attrition bias</b>   | Incomplete outcome data                | Only 5 lost to follow up, and demographics were compared between the groups and showed no differences. | Low                                                           |
| <b>Reporting bias</b>   | Selective reporting                    | None identified                                                                                        | Low                                                           |
| <b>Other bias</b>       | Anything else, ideally pre-specified   | n/a                                                                                                    |                                                               |

Mehuys *et al.* 2011

| Bias domain | Source of bias | Support for judgement | Review authors' judgement (low, unclear or high risk of bias) |
|-------------|----------------|-----------------------|---------------------------------------------------------------|
|-------------|----------------|-----------------------|---------------------------------------------------------------|

|                         |                                        |                                                                                                                                                                                                                                                                                                                                   |         |
|-------------------------|----------------------------------------|-----------------------------------------------------------------------------------------------------------------------------------------------------------------------------------------------------------------------------------------------------------------------------------------------------------------------------------|---------|
| <b>Selection bias</b>   | Random sequence generation             | "Randomization was performed at the pharmacy level. Each participating pharmacy was randomly assigned to either the control group or the intervention group. The sequence of allocation to control or intervention group was predetermined by the investigators based on randomization table generated using SPSS 14.0 software." | Low     |
|                         | Allocation concealment                 | Not described                                                                                                                                                                                                                                                                                                                     | Unclear |
| <b>Performance bias</b> | Blinding of participants and personnel | Not possible due to the design of the intervention                                                                                                                                                                                                                                                                                | High    |
| <b>Detection bias</b>   | Blinding of outcome assessment         | Not described                                                                                                                                                                                                                                                                                                                     | Unclear |
| <b>Attrition bias</b>   | Incomplete outcome data                | "Nearly all patients completed the study (control group: 132/135; intervention group: 148/153)."                                                                                                                                                                                                                                  | Low     |
| <b>Reporting bias</b>   | Selective reporting                    | None identified                                                                                                                                                                                                                                                                                                                   | Low     |
| <b>Other bias</b>       | Anything else, ideally pre-specified   | n/a                                                                                                                                                                                                                                                                                                                               |         |

Mehuys *et al.* 2008

| Bias domain             | Source of bias                         | Support for judgement                                                                                                                                                                                                                                                                             | Review authors' judgement (low, unclear or high risk of bias) |
|-------------------------|----------------------------------------|---------------------------------------------------------------------------------------------------------------------------------------------------------------------------------------------------------------------------------------------------------------------------------------------------|---------------------------------------------------------------|
| <b>Selection bias</b>   | Random sequence generation             | The sequence of allocation to either control or intervention group was predetermined by the investigators based on a randomisation table.                                                                                                                                                         | Low                                                           |
|                         | Allocation concealment                 | Predetermined by the investigators based on a randomisation table. The envelope with the lowest number was opened by the pharmacist upon inclusion of a new patient.                                                                                                                              | Low                                                           |
| <b>Performance bias</b> | Blinding of participants and personnel | Not possible due to the design of the intervention                                                                                                                                                                                                                                                | High                                                          |
| <b>Detection bias</b>   | Blinding of outcome assessment         | Not described                                                                                                                                                                                                                                                                                     | Unclear                                                       |
| <b>Attrition bias</b>   | Incomplete outcome data                | The primary outcome, i.e. the ACT score, was analysed using an intention-to-treat approach. Tests were made to check the success of the randomisation. These tests were also used to compare baseline characteristics of patients who did and did not complete the study. They were well matched. | Low                                                           |
| <b>Reporting bias</b>   | Selective reporting                    | None identified                                                                                                                                                                                                                                                                                   | Low                                                           |
| <b>Other bias</b>       | Anything else, ideally pre-specified   | n/a                                                                                                                                                                                                                                                                                               |                                                               |

Mohammadi *et al.* 2006

| Bias domain             | Source of bias                         | Support for judgement                                                                                                                                           | Review authors' judgement (low, unclear or high risk of bias) |
|-------------------------|----------------------------------------|-----------------------------------------------------------------------------------------------------------------------------------------------------------------|---------------------------------------------------------------|
| <b>Selection bias</b>   | Random sequence generation             | Each group was selected randomly via using their file numbers. They were then solicited to take part in the study. The groups of study were allocated randomly. | Unclear                                                       |
|                         | Allocation concealment                 | Not described                                                                                                                                                   | Unclear                                                       |
| <b>Performance bias</b> | Blinding of participants and personnel | Not possible due to the design of the intervention                                                                                                              | High                                                          |
| <b>Detection bias</b>   | Blinding of outcome assessment         | Not described                                                                                                                                                   | Unclear                                                       |
| <b>Attrition bias</b>   | Incomplete outcome data                | No dropouts mentioned                                                                                                                                           | Unclear                                                       |
| <b>Reporting bias</b>   | Selective reporting                    | None identified                                                                                                                                                 | Low                                                           |
| <b>Other bias</b>       | Anything else, ideally pre-specified   | n/a                                                                                                                                                             |                                                               |

Morgado *et al.* 2011

| Bias domain             | Source of bias                         | Support for judgement                                                                                                                                                                                                                                                                                 | Review authors' judgement (low, unclear or high risk of bias) |
|-------------------------|----------------------------------------|-------------------------------------------------------------------------------------------------------------------------------------------------------------------------------------------------------------------------------------------------------------------------------------------------------|---------------------------------------------------------------|
| <b>Selection bias</b>   | Random sequence generation             | Participants were allocated following simple randomisation procedures (equal allocation and without restrictions) using a computer-generated list of random numbers.                                                                                                                                  | Low                                                           |
|                         | Allocation concealment                 | The allocation sequence was concealed from the clinical pharmacist enrolling and assessing participants in sequentially numbered, opaque, sealed envelopes. The computer generated the allocation sequence and the envelopes were prepared by a researcher with no clinical involvement in the trial. | Low                                                           |
| <b>Performance bias</b> | Blinding of participants and personnel | Based on the nature of the intervention, it is not feasible to blind hypertensive patients in pharmaceutical intervention models.                                                                                                                                                                     | High                                                          |
| <b>Detection bias</b>   | Blinding of outcome assessment         | Whereas patients, pharmacists and physicians were aware of the patient allocated arm, nurses assessing BP were kept blinded to the allocation.                                                                                                                                                        | Low                                                           |
| <b>Attrition bias</b>   | Incomplete outcome data                | Low rate of dropouts, and demographics were compared.                                                                                                                                                                                                                                                 | Low                                                           |
| <b>Reporting bias</b>   | Selective reporting                    | None identified                                                                                                                                                                                                                                                                                       | Low                                                           |
| <b>Other bias</b>       | Anything else, ideally pre-specified   | The percentage of patients on angiotensin II receptor antagonists was the only significant difference detected between the two groups at baseline (P=0.018). Higher in the intervention group.                                                                                                        |                                                               |

Murray *et al.* 2009

| Bias domain             | Source of bias                         | Support for judgement                                                                                                                                                                                                                                                                                                                      | Review authors' judgement (low, unclear or high risk of bias) |
|-------------------------|----------------------------------------|--------------------------------------------------------------------------------------------------------------------------------------------------------------------------------------------------------------------------------------------------------------------------------------------------------------------------------------------|---------------------------------------------------------------|
| <b>Selection bias</b>   | Random sequence generation             | A research assistant randomly assigned patients to either an intervention or control group using a computer randomization protocol.                                                                                                                                                                                                        | Low                                                           |
|                         | Allocation concealment                 | Not described                                                                                                                                                                                                                                                                                                                              | Unclear                                                       |
| <b>Performance bias</b> | Blinding of participants and personnel | Not possible due to the design of the intervention                                                                                                                                                                                                                                                                                         | High                                                          |
| <b>Detection bias</b>   | Blinding of outcome assessment         | Computer programs were run by programmers blinded to treatment group assignment after patients had completed their full participation in the trials. A trained nurse abstractor, also blinded to group assignment, verified whether an ADE or ME had actually occurred using both electronic health records and the paper medical records. | Low                                                           |
| <b>Attrition bias</b>   | Incomplete outcome data                | Low dropout rate, and demographics compared. No differences between groups.                                                                                                                                                                                                                                                                | Low                                                           |
| <b>Reporting bias</b>   | Selective reporting                    | None identified                                                                                                                                                                                                                                                                                                                            | Low                                                           |
| <b>Other bias</b>       | Anything else, ideally pre-specified   | n/a                                                                                                                                                                                                                                                                                                                                        |                                                               |

Murray *et al.* 2007

| Bias domain             | Source of bias                         | Support for judgement                                                                                                                                                                                                                                                  | Review authors' judgement (low, unclear or high risk of bias) |
|-------------------------|----------------------------------------|------------------------------------------------------------------------------------------------------------------------------------------------------------------------------------------------------------------------------------------------------------------------|---------------------------------------------------------------|
| <b>Selection bias</b>   | Random sequence generation             | Using a univariate discrete distribution from the IMSL Fortran Library's subroutine RNGDA pseudorandom number generator (Absoft Corp., Rochester Hills, Michigan) Computerized.                                                                                        | Low                                                           |
|                         | Allocation concealment                 | Interviewers were blinded to patients' study status and played no role in the delivery of the intervention. Interviewers contacted a centralized data manager at the end of each interview to determine the patient's study assignment, which was otherwise concealed. | Low                                                           |
| <b>Performance bias</b> | Blinding of participants and personnel | Not possible due to the design of the intervention                                                                                                                                                                                                                     | High                                                          |
| <b>Detection bias</b>   | Blinding of outcome assessment         | Interviewer was blinded to patients' group assignments.                                                                                                                                                                                                                | Low                                                           |
| <b>Attrition bias</b>   | Incomplete outcome data                | Randomization resulted in well-balanced groups (Table 1), except that more patients in the usual care group than the intervention group had a history of                                                                                                               | Low                                                           |

|                       |                                      |                                                                                                                            |     |
|-----------------------|--------------------------------------|----------------------------------------------------------------------------------------------------------------------------|-----|
|                       |                                      | coronary artery disease (76% vs. 63%). Follow- up rates was similar in the intervention (87%) and usual care (85%) groups. |     |
| <b>Reporting bias</b> | Selective reporting                  | None identified                                                                                                            | Low |
| <b>Other bias</b>     | Anything else, ideally pre-specified | n/a                                                                                                                        |     |

Nazareth *et al.* 2001

| Bias domain             | Source of bias                         | Support for judgement                                                                                                                | Review authors' judgement (low, unclear or high risk of bias) |
|-------------------------|----------------------------------------|--------------------------------------------------------------------------------------------------------------------------------------|---------------------------------------------------------------|
| <b>Selection bias</b>   | Random sequence generation             | Randomised using computer-generated random numbers.                                                                                  | Low                                                           |
|                         | Allocation concealment                 | Computerized after given consent.                                                                                                    | Low                                                           |
| <b>Performance bias</b> | Blinding of participants and personnel | Not possible due to the design of the intervention                                                                                   | High                                                          |
| <b>Detection bias</b>   | Blinding of outcome assessment         | Research assistant remained blinded to the allocation of the patient. The allocation code was only revealed at the end of the study. | Low                                                           |
| <b>Attrition bias</b>   | Incomplete outcome data                | Data was collected at each follow up. A few dropouts, but demographics compared and showed do differences.                           | Low                                                           |
| <b>Reporting bias</b>   | Selective reporting                    | None identified                                                                                                                      | Low                                                           |
| <b>Other bias</b>       | Anything else, ideally pre-specified   | n/a                                                                                                                                  |                                                               |

Noureldin *et al.* 2012

| Bias domain             | Source of bias                         | Support for judgement                                            | Review authors' judgement (low, unclear or high risk of bias) |
|-------------------------|----------------------------------------|------------------------------------------------------------------|---------------------------------------------------------------|
| <b>Selection bias</b>   | Random sequence generation             | Not described                                                    | Unclear                                                       |
|                         | Allocation concealment                 | Not described                                                    | Unclear                                                       |
| <b>Performance bias</b> | Blinding of participants and personnel | Not possible due to the design of the intervention               | High                                                          |
| <b>Detection bias</b>   | Blinding of outcome assessment         | Not described                                                    | Unclear                                                       |
| <b>Attrition bias</b>   | Incomplete outcome data                | Consideration to dropouts not mentioned. About 10 % dropout rate | High                                                          |

|                       |                                      |                 |     |
|-----------------------|--------------------------------------|-----------------|-----|
| <b>Reporting bias</b> | Selective reporting                  | None identified | Low |
| <b>Other bias</b>     | Anything else, ideally pre-specified | n/a             |     |

Peterson et al. 2004

| Bias domain             | Source of bias                         | Support for judgement                                                                                                                                          | Review authors' judgement (low, unclear or high risk of bias) |
|-------------------------|----------------------------------------|----------------------------------------------------------------------------------------------------------------------------------------------------------------|---------------------------------------------------------------|
| <b>Selection bias</b>   | Random sequence generation             | Patients who provided written, informed consent were allocated to either the intervention or control group, using a computer-generated list of random numbers. | Low                                                           |
|                         | Allocation concealment                 | Computerized                                                                                                                                                   | Low                                                           |
| <b>Performance bias</b> | Blinding of participants and personnel | Not possible due to the design of the intervention (patients' GP was blinded).                                                                                 | High                                                          |
| <b>Detection bias</b>   | Blinding of outcome assessment         | Not described                                                                                                                                                  | Unclear                                                       |
| <b>Attrition bias</b>   | Incomplete outcome data                | About 14% dropout rate. Not further commented.                                                                                                                 | High                                                          |
| <b>Reporting bias</b>   | Selective reporting                    | None identified                                                                                                                                                | Low                                                           |
| <b>Other bias</b>       | Anything else, ideally pre-specified   | n/a                                                                                                                                                            |                                                               |

Phumipamorn et al. 2008

| Bias domain             | Source of bias                         | Support for judgement                                                                                                                                                                           | Review authors' judgement (low, unclear or high risk of bias) |
|-------------------------|----------------------------------------|-------------------------------------------------------------------------------------------------------------------------------------------------------------------------------------------------|---------------------------------------------------------------|
| <b>Selection bias</b>   | Random sequence generation             | 135 consented to participate in the study. They were selected randomly by drawing numbers from a container that included "1" for the study group (N= 67) and "2" for the control group (N= 68). | High                                                          |
|                         | Allocation concealment                 | Not concealed                                                                                                                                                                                   | High                                                          |
| <b>Performance bias</b> | Blinding of participants and personnel | Not possible due to the design of the intervention                                                                                                                                              | High                                                          |
| <b>Detection bias</b>   | Blinding of outcome assessment         | Not described                                                                                                                                                                                   | Unclear                                                       |
| <b>Attrition bias</b>   | Incomplete outcome data                | Low dropout rate                                                                                                                                                                                | Low                                                           |
| <b>Reporting bias</b>   | Selective reporting                    | None identified                                                                                                                                                                                 | Low                                                           |

|                   |                                      |                                                                                                                                                                                                                                                                                                                                             |
|-------------------|--------------------------------------|---------------------------------------------------------------------------------------------------------------------------------------------------------------------------------------------------------------------------------------------------------------------------------------------------------------------------------------------|
| <b>Other bias</b> | Anything else, ideally pre-specified | The study group had a higher number of female patients than in the control group ( $P = 0.03$ ). At baseline, more patients in the study group (73%) than in the control group (58.2%) were taking combined anti-diabetic drugs. The per cent pill count was marginally higher in the control group than in the study group ( $P = 0.05$ ). |
|-------------------|--------------------------------------|---------------------------------------------------------------------------------------------------------------------------------------------------------------------------------------------------------------------------------------------------------------------------------------------------------------------------------------------|

Pierce *et al.* 1989

| Bias domain             | Source of bias                         | Support for judgement                                          | Review authors' judgement (low, unclear or high risk of bias) |
|-------------------------|----------------------------------------|----------------------------------------------------------------|---------------------------------------------------------------|
| <b>Selection bias</b>   | Random sequence generation             | Not described                                                  | Unclear                                                       |
|                         | Allocation concealment                 | Not described                                                  | Unclear                                                       |
| <b>Performance bias</b> | Blinding of participants and personnel | Not possible due to the design of the intervention             | High                                                          |
| <b>Detection bias</b>   | Blinding of outcome assessment         | Not described                                                  | Unclear                                                       |
| <b>Attrition bias</b>   | Incomplete outcome data                | About 43% dropout rate, but included when compared to control. | Low                                                           |
| <b>Reporting bias</b>   | Selective reporting                    | None identified                                                | Low                                                           |
| <b>Other bias</b>       | Anything else, ideally pre-specified   | n/a                                                            |                                                               |

Pladevall *et al.* 2010

| Bias domain             | Source of bias                         | Support for judgement                                                                                                                                                                                                                                                                          | Review authors' judgement (low, unclear or high risk of bias) |
|-------------------------|----------------------------------------|------------------------------------------------------------------------------------------------------------------------------------------------------------------------------------------------------------------------------------------------------------------------------------------------|---------------------------------------------------------------|
| <b>Selection bias</b>   | Random sequence generation             | Block randomization was used to ensure that physicians were balanced across intervention and control groups within hospitals and primary care clinics. A computer-generated random-number list was used to randomize physicians, and investigators were not aware of the randomization scheme. | Low                                                           |
|                         | Allocation concealment                 | Randomization was centralized through a single coordinating centre, and the sequence was concealed until interventions were assigned.                                                                                                                                                          | Low                                                           |
| <b>Performance bias</b> | Blinding of participants and personnel | Not possible due to the design of the intervention                                                                                                                                                                                                                                             | High                                                          |
| <b>Detection bias</b>   | Blinding of outcome assessment         | The end points were adjudicated by a clinical events committee that was blinded to the patients' treatment group.<br><br>Statistical analyses were performed by an independent group blinded to group assignment.                                                                              | Low                                                           |
| <b>Attrition bias</b>   | Incomplete outcome data                | Outcomes were analysed on an intention-to-treat basis                                                                                                                                                                                                                                          | Low                                                           |

|                       |                                      |                 |     |
|-----------------------|--------------------------------------|-----------------|-----|
| <b>Reporting bias</b> | Selective reporting                  | None identified | Low |
| <b>Other bias</b>     | Anything else, ideally pre-specified | n/a             |     |

Polack *et al.* 2008

| Bias domain             | Source of bias                         | Support for judgement                                                                                                                                                | Review authors' judgement (low, unclear or high risk of bias) |
|-------------------------|----------------------------------------|----------------------------------------------------------------------------------------------------------------------------------------------------------------------|---------------------------------------------------------------|
| <b>Selection bias</b>   | Random sequence generation             | Not described                                                                                                                                                        | Unclear                                                       |
|                         | Allocation concealment                 | The randomization envelopes were prepared by a hospital employee not involved in the study, and investigators were blinded to the contents prior to opening the seal | Low                                                           |
| <b>Performance bias</b> | Blinding of participants and personnel | Nurses, physicians, and other non-pharmacist hospital staff were blinded with respect to group allocation, but patients and pharmacists were not.                    | High                                                          |
| <b>Detection bias</b>   | Blinding of outcome assessment         | The follow up survey was administered by a pharmacist who did not provide education to the patient and was blinded to the patient's group allocation.                | Low                                                           |
| <b>Attrition bias</b>   | Incomplete outcome data                | Only one patient lost to follow up                                                                                                                                   | Low                                                           |
| <b>Reporting bias</b>   | Selective reporting                    | None identified                                                                                                                                                      | Low                                                           |
| <b>Other bias</b>       | Anything else, ideally pre-specified   | n/a                                                                                                                                                                  |                                                               |

Qureshi *et al.* 2007

| Bias domain             | Source of bias                         | Support for judgement                                                       | Review authors' judgement (low, unclear or high risk of bias) |
|-------------------------|----------------------------------------|-----------------------------------------------------------------------------|---------------------------------------------------------------|
| <b>Selection bias</b>   | Random sequence generation             | Not described                                                               | Unclear                                                       |
|                         | Allocation concealment                 | Not described                                                               | Unclear                                                       |
| <b>Performance bias</b> | Blinding of participants and personnel | Not possible due to the design of the intervention                          | High                                                          |
| <b>Detection bias</b>   | Blinding of outcome assessment         | Outcome assessors were blinded to the randomisation status of participants. | Low                                                           |
| <b>Attrition bias</b>   | Incomplete outcome data                | Response rate=92.5%.                                                        | Low                                                           |

|                       |                                      |                 |     |
|-----------------------|--------------------------------------|-----------------|-----|
| <b>Reporting bias</b> | Selective reporting                  | None identified | Low |
| <b>Other bias</b>     | Anything else, ideally pre-specified | n/a             |     |

Ramanath *et al.* 2012

| Bias domain             | Source of bias                         | Support for judgement                                                                                                                                                                                                                                                | Review authors' judgement (low, unclear or high risk of bias) |
|-------------------------|----------------------------------------|----------------------------------------------------------------------------------------------------------------------------------------------------------------------------------------------------------------------------------------------------------------------|---------------------------------------------------------------|
| <b>Selection bias</b>   | Random sequence generation             | After obtaining the patient consent, the patients were randomized into the intervention and control group by a simple randomization technique [i.e. odd (in the control group) and even numbers (in an interventional group)] in order to minimise/prevent the bias. | Low                                                           |
|                         | Allocation concealment                 | Not described                                                                                                                                                                                                                                                        | Unclear                                                       |
| <b>Performance bias</b> | Blinding of participants and personnel | Not possible due to the design of the intervention                                                                                                                                                                                                                   | High                                                          |
| <b>Detection bias</b>   | Blinding of outcome assessment         | Not described                                                                                                                                                                                                                                                        | Unclear                                                       |
| <b>Attrition bias</b>   | Incomplete outcome data                | 7% dropout rate                                                                                                                                                                                                                                                      | Low                                                           |
| <b>Reporting bias</b>   | Selective reporting                    | None identified                                                                                                                                                                                                                                                      | Low                                                           |
| <b>Other bias</b>       | Anything else, ideally pre-specified   | n/a                                                                                                                                                                                                                                                                  |                                                               |

Ramanath *et al.* 2013

| Bias domain             | Source of bias                         | Support for judgement                              | Review authors' judgement (low, unclear or high risk of bias) |
|-------------------------|----------------------------------------|----------------------------------------------------|---------------------------------------------------------------|
| <b>Selection bias</b>   | Random sequence generation             | Not described                                      | Unclear                                                       |
|                         | Allocation concealment                 | Sealed envelopes                                   | Low                                                           |
| <b>Performance bias</b> | Blinding of participants and personnel | Not possible due to the design of the intervention | High                                                          |
| <b>Detection bias</b>   | Blinding of outcome assessment         | Not described                                      | Unclear                                                       |
| <b>Attrition bias</b>   | Incomplete outcome data                | Low dropout rate                                   | Low                                                           |

|                       |                                      |                 |     |
|-----------------------|--------------------------------------|-----------------|-----|
| <b>Reporting bias</b> | Selective reporting                  | None identified | Low |
| <b>Other bias</b>     | Anything else, ideally pre-specified | n/a             |     |

Rathbun *et al.* 2005

| Bias domain             | Source of bias                         | Support for judgement                                                                                                                                       | Review authors' judgement (low, unclear or high risk of bias) |
|-------------------------|----------------------------------------|-------------------------------------------------------------------------------------------------------------------------------------------------------------|---------------------------------------------------------------|
| <b>Selection bias</b>   | Random sequence generation             | Blocks of 4, not described closer                                                                                                                           | Unclear                                                       |
|                         | Allocation concealment                 | Not described                                                                                                                                               | Unclear                                                       |
| <b>Performance bias</b> | Blinding of participants and personnel | Not possible due to the design of the intervention                                                                                                          | High                                                          |
| <b>Detection bias</b>   | Blinding of outcome assessment         | Not described                                                                                                                                               | Unclear                                                       |
| <b>Attrition bias</b>   | Incomplete outcome data                | All primary analyses were conducted using an intent-to-treat (ITT)                                                                                          | Low                                                           |
| <b>Reporting bias</b>   | Selective reporting                    | None identified                                                                                                                                             | Low                                                           |
| <b>Other bias</b>       | Anything else, ideally pre-specified   | Patients assigned to the adherence clinic group had higher CD4 counts (median [SD], 296 [278] vs. 104 [103] cells/L in the standard care group; P = 0.008). |                                                               |

Rickles *et al.* 2006

| Bias domain             | Source of bias                         | Support for judgement                                    | Review authors' judgement (low, unclear or high risk of bias) |
|-------------------------|----------------------------------------|----------------------------------------------------------|---------------------------------------------------------------|
| <b>Selection bias</b>   | Random sequence generation             | Not described                                            | Unclear                                                       |
|                         | Allocation concealment                 | Not described                                            | Unclear                                                       |
| <b>Performance bias</b> | Blinding of participants and personnel | Not possible due to the design of the intervention       | High                                                          |
| <b>Detection bias</b>   | Blinding of outcome assessment         | Not described                                            | Unclear                                                       |
| <b>Attrition bias</b>   | Incomplete outcome data                | Low dropout rate. Only three patients lost for follow-up | Low                                                           |
| <b>Reporting bias</b>   | Selective reporting                    | None identified                                          | Low                                                           |

|                   |                                      |                                                                                                                                 |
|-------------------|--------------------------------------|---------------------------------------------------------------------------------------------------------------------------------|
| <b>Other bias</b> | Anything else, ideally pre-specified | At baseline, patients in the intervention group were more likely to have a history of psychotropic medication use ( $P<0.05$ ). |
|-------------------|--------------------------------------|---------------------------------------------------------------------------------------------------------------------------------|

Rickles *et al.* 2005

| Bias domain             | Source of bias                         | Support for judgement                                                                                                           | Review authors' judgement (low, unclear or high risk of bias) |
|-------------------------|----------------------------------------|---------------------------------------------------------------------------------------------------------------------------------|---------------------------------------------------------------|
| <b>Selection bias</b>   | Random sequence generation             | The researcher prepared 10 pieces of paper with sequential numbers                                                              | High                                                          |
|                         | Allocation concealment                 | Concealed until patient enrolled. Then the pharmacist took out a piece of paper from the envelope                               | Low                                                           |
| <b>Performance bias</b> | Blinding of participants and personnel | Not possible due to the design of the intervention                                                                              | High                                                          |
| <b>Detection bias</b>   | Blinding of outcome assessment         | Not described                                                                                                                   | Unclear                                                       |
| <b>Attrition bias</b>   | Incomplete outcome data                | intention-to-treat                                                                                                              | Low                                                           |
| <b>Reporting bias</b>   | Selective reporting                    | Data on medication adherence not shown                                                                                          | Unclear                                                       |
| <b>Other bias</b>       | Anything else, ideally pre-specified   | At baseline, patients in the intervention group were more likely to have a history of psychotropic medication use ( $P<0.05$ ). |                                                               |

Sadik *et al.* 2005

| Bias domain             | Source of bias                         | Support for judgement                                                                                     | Review authors' judgement (low, unclear or high risk of bias) |
|-------------------------|----------------------------------------|-----------------------------------------------------------------------------------------------------------|---------------------------------------------------------------|
| <b>Selection bias</b>   | Random sequence generation             | Not described                                                                                             | Unclear                                                       |
|                         | Allocation concealment                 | Not described                                                                                             | Unclear                                                       |
| <b>Performance bias</b> | Blinding of participants and personnel | Not possible due to the design of the intervention                                                        | High                                                          |
| <b>Detection bias</b>   | Blinding of outcome assessment         | Assessment of the 2-min walk test and the FVC test was blinded. But not described for the other outcomes. | Unclear                                                       |
| <b>Attrition bias</b>   | Incomplete outcome data                | Low dropout rate                                                                                          | Low                                                           |

|                       |                                      |                 |     |
|-----------------------|--------------------------------------|-----------------|-----|
| <b>Reporting bias</b> | Selective reporting                  | None identified | Low |
| <b>Other bias</b>     | Anything else, ideally pre-specified | n/a             |     |

Sathvik *et al.* 2013

| Bias domain             | Source of bias                         | Support for judgement                              | Review authors' judgement (low, unclear or high risk of bias) |
|-------------------------|----------------------------------------|----------------------------------------------------|---------------------------------------------------------------|
| <b>Selection bias</b>   | Random sequence generation             | Not described                                      | Unclear                                                       |
|                         | Allocation concealment                 | Not described                                      | Unclear                                                       |
| <b>Performance bias</b> | Blinding of participants and personnel | Not possible due to the design of the intervention | High                                                          |
| <b>Detection bias</b>   | Blinding of outcome assessment         | Not described                                      | Unclear                                                       |
| <b>Attrition bias</b>   | Incomplete outcome data                | No patients lost to follow-up                      | Low                                                           |
| <b>Reporting bias</b>   | Selective reporting                    | None identified                                    | Low                                                           |
| <b>Other bias</b>       | Anything else, ideally pre-specified   | n/a                                                |                                                               |

Shah *et al.* 2012

| Bias domain             | Source of bias                         | Support for judgement                              | Review authors' judgement (low, unclear or high risk of bias) |
|-------------------------|----------------------------------------|----------------------------------------------------|---------------------------------------------------------------|
| <b>Selection bias</b>   | Random sequence generation             | Not described                                      | Unclear                                                       |
|                         | Allocation concealment                 | Not described                                      | Unclear                                                       |
| <b>Performance bias</b> | Blinding of participants and personnel | Not possible due to the design of the intervention | High                                                          |
| <b>Detection bias</b>   | Blinding of outcome assessment         | Not described                                      | Unclear                                                       |
| <b>Attrition bias</b>   | Incomplete outcome data                | Low dropout rate                                   | Low                                                           |

|                       |                                      |                                                                                                                                                                                              |     |
|-----------------------|--------------------------------------|----------------------------------------------------------------------------------------------------------------------------------------------------------------------------------------------|-----|
| <b>Reporting bias</b> | Selective reporting                  | None identified                                                                                                                                                                              | Low |
| <b>Other bias</b>     | Anything else, ideally pre-specified | Baseline demographics were similar between both the groups except there was higher systolic BP (P=0.002) and A1C (P=0.04), and shorter diabetes duration (P=0.02) in the intervention group. |     |

Sookaneknun *et al.* 2004

| Bias domain             | Source of bias                         | Support for judgement                                                                                                                                                                 | Review authors' judgement (low, unclear or high risk of bias) |
|-------------------------|----------------------------------------|---------------------------------------------------------------------------------------------------------------------------------------------------------------------------------------|---------------------------------------------------------------|
| <b>Selection bias</b>   | Random sequence generation             | Not described                                                                                                                                                                         | Unclear                                                       |
|                         | Allocation concealment                 | Not described                                                                                                                                                                         | Unclear                                                       |
| <b>Performance bias</b> | Blinding of participants and personnel | Not possible due to the design of the intervention                                                                                                                                    | High                                                          |
| <b>Detection bias</b>   | Blinding of outcome assessment         | Not described                                                                                                                                                                         | Unclear                                                       |
| <b>Attrition bias</b>   | Incomplete outcome data                | Intent-to-treat was used as the basis for inclusion in the study to reduce the bias that would occur if patients who dropped out of the study were not included in the total numbers. | Low                                                           |
| <b>Reporting bias</b>   | Selective reporting                    | None identified                                                                                                                                                                       | Low                                                           |
| <b>Other bias</b>       | Anything else, ideally pre-specified   | n/a                                                                                                                                                                                   |                                                               |

Stevens et al. 2002

| Bias domain             | Source of bias                         | Support for judgement                                                                                                                                                                                                          | Review authors' judgement (low, unclear or high risk of bias) |
|-------------------------|----------------------------------------|--------------------------------------------------------------------------------------------------------------------------------------------------------------------------------------------------------------------------------|---------------------------------------------------------------|
| <b>Selection bias</b>   | Random sequence generation             | Computer-generated random sequence                                                                                                                                                                                             | Low                                                           |
|                         | Allocation concealment                 | The participating pharmacies were provided with a supply of opaque randomization envelopes, and the pharmacists were trained to open the top envelope to determine the treatment assignment for each new research participant. | Low                                                           |
| <b>Performance bias</b> | Blinding of participants and personnel | Not possible due to the design of the intervention                                                                                                                                                                             | High                                                          |
| <b>Detection bias</b>   | Blinding of outcome assessment         | All data collectors were masked to treatment assignments.                                                                                                                                                                      | Low                                                           |
| <b>Attrition bias</b>   | Incomplete outcome data                | Participants with missing follow-up data were not included in the analyses of follow-up data. However, quite low dropout rate (10%).                                                                                           | Low                                                           |

|                       |                                      |                 |     |
|-----------------------|--------------------------------------|-----------------|-----|
| <b>Reporting bias</b> | Selective reporting                  | None identified | Low |
| <b>Other bias</b>     | Anything else, ideally pre-specified | n/a             |     |

Sturgess *et al.* 2003

| Bias domain             | Source of bias                         | Support for judgement                                                                                                                                                                                                  | Review authors' judgement (low, unclear or high risk of bias) |
|-------------------------|----------------------------------------|------------------------------------------------------------------------------------------------------------------------------------------------------------------------------------------------------------------------|---------------------------------------------------------------|
| <b>Selection bias</b>   | Random sequence generation             | Not described                                                                                                                                                                                                          | Unclear                                                       |
|                         | Allocation concealment                 | Not described                                                                                                                                                                                                          | Unclear                                                       |
| <b>Performance bias</b> | Blinding of participants and personnel | Not possible due to the design of the intervention                                                                                                                                                                     | High                                                          |
| <b>Detection bias</b>   | Blinding of outcome assessment         | Where possible, data collection via interview was performed by a member of staff other than the pharmacist, e.g. pharmacy assistant, to minimise bias.<br>Not specified how much data was collected by the pharmacist. | Unclear                                                       |
| <b>Attrition bias</b>   | Incomplete outcome data                | High dropout rate, not taken in consideration in the results.                                                                                                                                                          | High                                                          |
| <b>Reporting bias</b>   | Selective reporting                    | Sign and symptom control not compared between the groups. All other outcomes were compared between the groups.                                                                                                         | Low                                                           |
| <b>Other bias</b>       | Anything else, ideally pre-specified   | Baseline differences between patient and control groups: intervention patients were prescribed more medications (P<0.05).                                                                                              |                                                               |

Thompson *et al.* 1986

| Bias domain             | Source of bias                         | Support for judgement                              | Review authors' judgement (low, unclear or high risk of bias) |
|-------------------------|----------------------------------------|----------------------------------------------------|---------------------------------------------------------------|
| <b>Selection bias</b>   | Random sequence generation             | Not described                                      | Unclear                                                       |
|                         | Allocation concealment                 | Not described                                      | Unclear                                                       |
| <b>Performance bias</b> | Blinding of participants and personnel | Not possible due to the design of the intervention | High                                                          |
| <b>Detection bias</b>   | Blinding of outcome assessment         | Not described                                      | Unclear                                                       |
| <b>Attrition bias</b>   | Incomplete outcome data                | Doesn't seem to be any dropouts                    | Low                                                           |
| <b>Reporting bias</b>   | Selective reporting                    | None identified                                    | Low                                                           |

|                   |                                      |     |
|-------------------|--------------------------------------|-----|
| <b>Other bias</b> | Anything else, ideally pre-specified | n/a |
|-------------------|--------------------------------------|-----|

Turner *et al.* 1994

| Bias domain      | Source of bias                         | Support for judgement                                                                                                                                           | Review authors' judgement (low, unclear or high risk of bias) |
|------------------|----------------------------------------|-----------------------------------------------------------------------------------------------------------------------------------------------------------------|---------------------------------------------------------------|
| Selection bias   | Random sequence generation             | Randomly assigned to either a control or test group, using the last digit of their unique Community Health Index number (Grampian's primary care index number). | High                                                          |
|                  | Allocation concealment                 | Not concealed                                                                                                                                                   | High                                                          |
| Performance bias | Blinding of participants and personnel | Not possible due to the design of the intervention                                                                                                              | High                                                          |
| Detection bias   | Blinding of outcome assessment         | Not described                                                                                                                                                   | Unclear                                                       |
| Attrition bias   | Incomplete outcome data                | No dropouts                                                                                                                                                     | Low                                                           |
| Reporting bias   | Selective reporting                    | None identified                                                                                                                                                 | Low                                                           |
| Other bias       | Anything else, ideally pre-specified   | n/a                                                                                                                                                             |                                                               |

Varma *et al.* 1999

| Bias domain             | Source of bias                         | Support for judgement                                                                                                                                                                                                                                                       | Review authors' judgement (low, unclear or high risk of bias) |
|-------------------------|----------------------------------------|-----------------------------------------------------------------------------------------------------------------------------------------------------------------------------------------------------------------------------------------------------------------------------|---------------------------------------------------------------|
| <b>Selection bias</b>   | Random sequence generation             | Minimization                                                                                                                                                                                                                                                                | Low                                                           |
|                         | Allocation concealment                 | Not described                                                                                                                                                                                                                                                               | Unclear                                                       |
| <b>Performance bias</b> | Blinding of participants and personnel | Not possible due to the design of the intervention                                                                                                                                                                                                                          | High                                                          |
| <b>Detection bias</b>   | Blinding of outcome assessment         | Not described                                                                                                                                                                                                                                                               | Unclear                                                       |
| <b>Attrition bias</b>   | Incomplete outcome data                | High dropout rate (41%), and not taken in consideration in the results.                                                                                                                                                                                                     | High                                                          |
| <b>Reporting bias</b>   | Selective reporting                    | None identified                                                                                                                                                                                                                                                             | Low                                                           |
| <b>Other bias</b>       | Anything else, ideally pre-specified   | At baseline, patients in the intervention group had a tendency to better health (MLHF questionnaire scores, 2-minute walk test). The only differences that were statistically significant were drug knowledge scores and scores for the physical function domain of the SF- |                                                               |

Vivian *et al.* 2002

| Bias domain             | Source of bias                         | Support for judgement                                                                                     | Review authors' judgement (low, unclear or high risk of bias) |
|-------------------------|----------------------------------------|-----------------------------------------------------------------------------------------------------------|---------------------------------------------------------------|
| <b>Selection bias</b>   | Random sequence generation             | Not described                                                                                             | Unclear                                                       |
|                         | Allocation concealment                 | Not described                                                                                             | Unclear                                                       |
| <b>Performance bias</b> | Blinding of participants and personnel | Not possible due to the design of the intervention                                                        | High                                                          |
| <b>Detection bias</b>   | Blinding of outcome assessment         | Not described                                                                                             | Unclear                                                       |
| <b>Attrition bias</b>   | Incomplete outcome data                | Low dropout rate (3/53)                                                                                   | Low                                                           |
| <b>Reporting bias</b>   | Selective reporting                    | None identified                                                                                           | Low                                                           |
| <b>Other bias</b>       | Anything else, ideally pre-specified   | Patients in the intervention group had higher diastolic BP at baseline than the control group (P=0.0012). |                                                               |

Volume *et al.* 2001

| Bias domain             | Source of bias                         | Support for judgement                                                                                                                                                | Review authors' judgement (low, unclear or high risk of bias) |
|-------------------------|----------------------------------------|----------------------------------------------------------------------------------------------------------------------------------------------------------------------|---------------------------------------------------------------|
| <b>Selection bias</b>   | Random sequence generation             | Not described                                                                                                                                                        | Unclear                                                       |
|                         | Allocation concealment                 | A blinded statistician carried out the randomisation of pharmacies                                                                                                   | Low                                                           |
| <b>Performance bias</b> | Blinding of participants and personnel | Not possible due to the design of the intervention. However, the control pharmacists were not told which patients had or had not agreed to participate in the study. | High                                                          |
| <b>Detection bias</b>   | Blinding of outcome assessment         | Data was collected using a telephone survey administrated by the Population Research Lab at the University of Alberta.                                               | Unclear                                                       |
| <b>Attrition bias</b>   | Incomplete outcome data                | About 20 % dropout rate. Demographics compared at baseline, and only difference was that dropouts were in average 2 years older than the ones                        | Low                                                           |

|                       |                                      |                                                                                                                                                                                                                        |     |
|-----------------------|--------------------------------------|------------------------------------------------------------------------------------------------------------------------------------------------------------------------------------------------------------------------|-----|
|                       |                                      | remaining in the study.                                                                                                                                                                                                |     |
| <b>Reporting bias</b> | Selective reporting                  | None identified                                                                                                                                                                                                        | Low |
| <b>Other bias</b>     | Anything else, ideally pre-specified | At baseline, patients in the intervention group reported a higher number of prescription medications taken than the control group. However, there was no significant difference in self-reported medication adherence. |     |

Vuong *et al.* 2008

| Bias domain             | Source of bias                         | Support for judgement                                                                                                                                                                                                                                                                                                    | Review authors' judgement (low, unclear or high risk of bias) |
|-------------------------|----------------------------------------|--------------------------------------------------------------------------------------------------------------------------------------------------------------------------------------------------------------------------------------------------------------------------------------------------------------------------|---------------------------------------------------------------|
| <b>Selection bias</b>   | Random sequence generation             | Computer generated list of random numbers                                                                                                                                                                                                                                                                                | Low                                                           |
|                         | Allocation concealment                 | Not concealed                                                                                                                                                                                                                                                                                                            | High                                                          |
| <b>Performance bias</b> | Blinding of participants and personnel | Not possible due to the design of the intervention                                                                                                                                                                                                                                                                       | High                                                          |
| <b>Detection bias</b>   | Blinding of outcome assessment         | Not described                                                                                                                                                                                                                                                                                                            | Unclear                                                       |
| <b>Attrition bias</b>   | Incomplete outcome data                | High dropout rate. Not considered in the results.                                                                                                                                                                                                                                                                        | High                                                          |
| <b>Reporting bias</b>   | Selective reporting                    | None identified                                                                                                                                                                                                                                                                                                          | Low                                                           |
| <b>Other bias</b>       | Anything else, ideally pre-specified   | Despite proper randomisation technique the intervention patients tended to be older, more likely to be female and more likely to have had their medication regimens altered during hospitalisation, required support services following hospitalisation or have had more language barriers than the standard care group. |                                                               |

Wandless *et al.* 1981

| Bias domain             | Source of bias                         | Support for judgement                              | Review authors' judgement (low, unclear or high risk of bias) |
|-------------------------|----------------------------------------|----------------------------------------------------|---------------------------------------------------------------|
| <b>Selection bias</b>   | Random sequence generation             | Not described                                      | Unclear                                                       |
|                         | Allocation concealment                 | Not described                                      | Unclear                                                       |
| <b>Performance bias</b> | Blinding of participants and personnel | Not possible due to the design of the intervention | High                                                          |
| <b>Detection bias</b>   | Blinding of outcome assessment         | Not described                                      | Unclear                                                       |
| <b>Attrition bias</b>   | Incomplete outcome data                | Doesn't seem to be any dropouts                    | Low                                                           |

|                       |                                      |                 |     |
|-----------------------|--------------------------------------|-----------------|-----|
| <b>Reporting bias</b> | Selective reporting                  | None identified | Low |
| <b>Other bias</b>     | Anything else, ideally pre-specified | n/a             |     |

Wang *et al.* 2010

| Bias domain             | Source of bias                         | Support for judgement                              | Review authors' judgement (low, unclear or high risk of bias) |
|-------------------------|----------------------------------------|----------------------------------------------------|---------------------------------------------------------------|
| <b>Selection bias</b>   | Random sequence generation             | Not described                                      | Unclear                                                       |
|                         | Allocation concealment                 | Not described                                      | Unclear                                                       |
| <b>Performance bias</b> | Blinding of participants and personnel | Not possible due to the design of the intervention | High                                                          |
| <b>Detection bias</b>   | Blinding of outcome assessment         | Not described                                      | Unclear                                                       |
| <b>Attrition bias</b>   | Incomplete outcome data                | Low dropout rate                                   | Low                                                           |
| <b>Reporting bias</b>   | Selective reporting                    | None identified                                    | Low                                                           |
| <b>Other bias</b>       | Anything else, ideally pre-specified   | n/a                                                |                                                               |

Weinberger *et al.* 2002

| Bias domain             | Source of bias                         | Support for judgement                              | Review authors' judgement (low, unclear or high risk of bias) |
|-------------------------|----------------------------------------|----------------------------------------------------|---------------------------------------------------------------|
| <b>Selection bias</b>   | Random sequence generation             | Not described                                      | Unclear                                                       |
|                         | Allocation concealment                 | Concealed                                          | Low                                                           |
| <b>Performance bias</b> | Blinding of participants and personnel | Not possible due to the design of the intervention | High                                                          |
| <b>Detection bias</b>   | Blinding of outcome assessment         | Blinded interviewers                               | Low                                                           |
| <b>Attrition bias</b>   | Incomplete outcome data                | Using intent-to-treat analysis                     | Low                                                           |
| <b>Reporting bias</b>   | Selective reporting                    | None identified                                    | Low                                                           |

|                   |                                      |                                                                                                              |
|-------------------|--------------------------------------|--------------------------------------------------------------------------------------------------------------|
| <b>Other bias</b> | Anything else, ideally pre-specified | Study groups were comparable as baseline ( $P>0.05$ ), except for race (both diseases) and PEFR (COPD only). |
|-------------------|--------------------------------------|--------------------------------------------------------------------------------------------------------------|

Williford *et al.* 1995

| Bias domain             | Source of bias                         | Support for judgement                                                                   | Review authors' judgement (low, unclear or high risk of bias) |
|-------------------------|----------------------------------------|-----------------------------------------------------------------------------------------|---------------------------------------------------------------|
| <b>Selection bias</b>   | Random sequence generation             | Not described                                                                           | Unclear                                                       |
|                         | Allocation concealment                 | Not described                                                                           | Unclear                                                       |
| <b>Performance bias</b> | Blinding of participants and personnel | Not possible due to the design of the intervention                                      | High                                                          |
| <b>Detection bias</b>   | Blinding of outcome assessment         | Not described                                                                           | Unclear                                                       |
| <b>Attrition bias</b>   | Incomplete outcome data                | About 16% dropout rate. Not taken in consideration, even in comparison of demographics. | High                                                          |
| <b>Reporting bias</b>   | Selective reporting                    | None identified                                                                         | Low                                                           |
| <b>Other bias</b>       | Anything else, ideally pre-specified   | n/a                                                                                     |                                                               |

Wong *et al.* 2013

| Bias domain             | Source of bias                         | Support for judgement                              | Review authors' judgement (low, unclear or high risk of bias) |
|-------------------------|----------------------------------------|----------------------------------------------------|---------------------------------------------------------------|
| <b>Selection bias</b>   | Random sequence generation             | Computer-generated                                 | Low                                                           |
|                         | Allocation concealment                 | Concealed                                          | Low                                                           |
| <b>Performance bias</b> | Blinding of participants and personnel | Not possible due to the design of the intervention | High                                                          |
| <b>Detection bias</b>   | Blinding of outcome assessment         | BP measured by blinded researchers                 | Low                                                           |
| <b>Attrition bias</b>   | Incomplete outcome data                | Intent-to-treat analysis                           | Low                                                           |
| <b>Reporting bias</b>   | Selective reporting                    | None identified                                    | Low                                                           |
| <b>Other bias</b>       | Anything else, ideally pre-specified   | n/a                                                |                                                               |

Wu *et al.* 2006

| Bias domain             | Source of bias                         | Support for judgement                                                                                                                                              | Review authors' judgement (low, unclear or high risk of bias) |
|-------------------------|----------------------------------------|--------------------------------------------------------------------------------------------------------------------------------------------------------------------|---------------------------------------------------------------|
| <b>Selection bias</b>   | Random sequence generation             | Computer-generated                                                                                                                                                 | Low                                                           |
|                         | Allocation concealment                 | Pharmacist was blinded to the randomisation code. The group assignments were in concealed envelopes                                                                | Low                                                           |
| <b>Performance bias</b> | Blinding of participants and personnel | Not possible due to the design of the intervention                                                                                                                 | High                                                          |
| <b>Detection bias</b>   | Blinding of outcome assessment         | Not described                                                                                                                                                      | Unclear                                                       |
| <b>Attrition bias</b>   | Incomplete outcome data                | Intention to treat analysis                                                                                                                                        | Low                                                           |
| <b>Reporting bias</b>   | Selective reporting                    | None identified                                                                                                                                                    | Low                                                           |
| <b>Other bias</b>       | Anything else, ideally pre-specified   | Baseline characteristics were similar except that the control group had a lower compliance score (table 1) and lower use of lipid lowering and antiplatelet drugs. |                                                               |

Young *et al.* 2012

| Bias domain             | Source of bias                         | Support for judgement                                                      | Review authors' judgement (low, unclear or high risk of bias) |
|-------------------------|----------------------------------------|----------------------------------------------------------------------------|---------------------------------------------------------------|
| <b>Selection bias</b>   | Random sequence generation             | Not described                                                              | Unclear                                                       |
|                         | Allocation concealment                 | Not described                                                              | Unclear                                                       |
| <b>Performance bias</b> | Blinding of participants and personnel | Not possible due to the design of the intervention                         | High                                                          |
| <b>Detection bias</b>   | Blinding of outcome assessment         | Researchers were blinded to patients' allocation                           | Low                                                           |
| <b>Attrition bias</b>   | Incomplete outcome data                | A dropout rate of 15%. All available data during the study period was used | Low                                                           |
| <b>Reporting bias</b>   | Selective reporting                    | None identified                                                            | Low                                                           |
| <b>Other bias</b>       | Anything else, ideally pre-specified   | n/a                                                                        |                                                               |

Zerafa *et al.* 2011

| Bias domain             | Source of bias                         | Support for judgement                                                                  | Review authors' judgement (low, unclear or high risk of bias) |
|-------------------------|----------------------------------------|----------------------------------------------------------------------------------------|---------------------------------------------------------------|
| <b>Selection bias</b>   | Random sequence generation             | The two groups were chosen according to the last digit of the patient's identity card. | High                                                          |
|                         | Allocation concealment                 | Not concealed                                                                          | High                                                          |
| <b>Performance bias</b> | Blinding of participants and personnel | Not possible due to the design of the intervention                                     | High                                                          |
| <b>Detection bias</b>   | Blinding of outcome assessment         | Not described                                                                          | Unclear                                                       |
| <b>Attrition bias</b>   | Incomplete outcome data                | Low dropout rate                                                                       | Low                                                           |
| <b>Reporting bias</b>   | Selective reporting                    | None identified                                                                        | Low                                                           |
| <b>Other bias</b>       | Anything else, ideally pre-specified   | n/a                                                                                    |                                                               |

Zhang *et al.* 2012

| Bias domain             | Source of bias                         | Support for judgement                                                                                                                    | Review authors' judgement (low, unclear or high risk of bias) |
|-------------------------|----------------------------------------|------------------------------------------------------------------------------------------------------------------------------------------|---------------------------------------------------------------|
| <b>Selection bias</b>   | Random sequence generation             | Randomization was completed by SPSS 16.0-generated algorithm.                                                                            | Low                                                           |
|                         | Allocation concealment                 | Treating assignments, kept in sealed opaque envelopes with only number labelled, were opened after patient gave their informed consents. | Low                                                           |
| <b>Performance bias</b> | Blinding of participants and personnel | Not possible due to the design of the intervention                                                                                       | High                                                          |
| <b>Detection bias</b>   | Blinding of outcome assessment         | Blinded                                                                                                                                  | Low                                                           |
| <b>Attrition bias</b>   | Incomplete outcome data                | Intention to treat (ITT) was used to analyse the data                                                                                    | Low                                                           |
| <b>Reporting bias</b>   | Selective reporting                    | None identified                                                                                                                          | Low                                                           |
| <b>Other bias</b>       | Anything else, ideally pre-specified   | n/a                                                                                                                                      |                                                               |
